# Supplementary material for: Joint sequencing of human and pathogen genomes reveals the genetics of pneumococcal meningitis
Source: PubMed Central journal article supplement (PMC6520353; doi:10.1038/s41467-019-09976-3), 2019-05-15
Supplement: 41467_2019_9976_MOESM1_ESM.pdf [file 41467_2019_9976_MOESM1_ESM.pdf]

## Supplementary tables

**Supplementary table 1:** Clinical characteristics of 1168 patients with community-acquired bacterial meningitis. Data are number/number evaluated (percentage), continuous data are mean  $\pm$ SD. <sup>b</sup>Systolic blood pressure was evaluated in 1146 patients, heart rate in 1133, temperature in 1153. <sup>c</sup>Glasgow Coma Scale score was evaluated in 1163 patients. <sup>d</sup>CSF opening pressure was evaluated in 439 patients, CSF WBC count in 1102 patients, CSF protein in 1113, CSF blood:glucose ratio in 1086.

| Characteristic                                        | Value            |
|-------------------------------------------------------|------------------|
| Age – (yr)                                            | 56 $\pm$ 17      |
| Male sex – no (%)                                     | 595/1168 (50%)   |
| Duration of symptoms <24 hr                           | 525/1125 (47%)   |
| Pretreatment with antibiotics                         | 139/1138 (12%)   |
| Positive blood cultures                               | 764/1052 (73%)   |
| <b>Predisposing conditions</b>                        |                  |
| Otitis or sinusitis                                   | 425/1161 (37%)   |
| Pneumonia                                             | 94/1127 (8%)     |
| Immunocompromised                                     | 291/1168 (25%)   |
| <b>Symptoms and signs on presentation<sup>b</sup></b> |                  |
| Headache                                              | 884/1047 (84%)   |
| Neck stiffness                                        | 827/1109 (76%)   |
| Systolic blood pressure – mmHg                        | 144 $\pm$ 28     |
| Heart rate – beats/min                                | 99 $\pm$ 21      |
| Body temperature – °C                                 | 38.7 $\pm$ 1.3   |
| Focal neurologic deficits                             | 309/1164 (26%)   |
| <b>Score on Glasgow Coma Scale<sup>c</sup></b>        |                  |
| <8 indicating coma                                    | 133/1163 (11%)   |
| <b>Indexes of CSF inflammation<sup>d</sup></b>        |                  |
| Opening pressure (mm H <sub>2</sub> O)                | 38 $\pm$ 12      |
| White blood cell count (/mm <sup>3</sup> )            | 6784 $\pm$ 21858 |
| White blood cell count <1mm <sup>-3</sup>             | 327/1102 (30%)   |
| Protein – g/L                                         | 4.4 $\pm$ 3.7    |
| CSF: blood glucose ratio                              | 0.16 $\pm$ 0.19  |
| <b>Complications</b>                                  |                  |
| Cardiorespiratory failure                             | 227/1139 (19%)   |
| Focal neurologic deficits                             | 239/1134 (21%)   |
| Seizures                                              | 131/1120 (12%)   |
| <b>Score on Glasgow Outcome Scale</b>                 |                  |
| 1 – death                                             | 76 (7%)          |
| 2 – vegetative state                                  | 2 (0.2%)         |
| 3 – severe disability                                 | 46 (4%)          |
| 4 – moderate disability                               | 197 (17%)        |
| 5 – good recovery                                     | 845 (72%)        |

**Supplementary table 2:** Clinical characteristics of 741 patients with community-acquired pneumococcal meningitis. Data are number/number evaluated (percentage), continuous data are mean  $\pm$ SD. <sup>b</sup>Systolic blood pressure was evaluated in 727 patients, heart rate in 719, temperature in 732. <sup>c</sup>Glasgow Coma Scale score was evaluated in 738 patients. <sup>d</sup>CSF opening pressure was evaluated in 278 patients, CSF WBC count in 704 patients, CSF protein in 706, CSF blood:glucose ratio in 703.

| Characteristic                                        | Value            |
|-------------------------------------------------------|------------------|
| Age – (yr)                                            | 58 $\pm$ 14      |
| Male sex – no (%)                                     | 358/741 (48%)    |
| Duration of symptoms <24 hr                           | 357/714 (50%)    |
| Pretreatment with antibiotics                         | 84/704 (12%)     |
| Positive blood cultures                               | 534/652 (82%)    |
| <b>Predisposing conditions</b>                        |                  |
| Otitis or sinusitis                                   | 338/735 (46%)    |
| Pneumonia                                             | 70/707 (10%)     |
| Immunocompromised                                     | 189/741 (26%)    |
| <b>Symptoms and signs on presentation<sup>b</sup></b> |                  |
| Headache                                              | 551/656 (84%)    |
| Neck stiffness                                        | 538/698 (77%)    |
| Systolic blood pressure – mmHg                        | 148 $\pm$ 28     |
| Heart rate – beats/min                                | 100 $\pm$ 21     |
| Body temperature – °C                                 | 38.8 $\pm$ 1.3   |
| Focal neurologic deficits                             | 204/738 (28%)    |
| <b>Score on Glasgow Coma Scale<sup>c</sup></b>        |                  |
| <8 indicating coma                                    | 98/738 (13%)     |
| <b>Indexes of CSF inflammation<sup>d</sup></b>        |                  |
| Opening pressure (mm H <sub>2</sub> O)                | 41 $\pm$ 11      |
| White blood cell count (/mm <sup>3</sup> )            | 6859 $\pm$ 23610 |
| White blood cell count <1mm <sup>-3</sup>             | 220/704 (31%)    |
| Protein – g/L                                         | 4.7 $\pm$ 3.5    |
| CSF: blood glucose ratio                              | 0.13 $\pm$ 0.17  |
| <b>Complications</b>                                  |                  |
| Cardiorespiratory failure                             | 168/721 (23%)    |
| Focal neurologic deficits                             | 160/708 (23%)    |
| Seizures                                              | 106/716 (17%)    |
| <b>Score on Glasgow Outcome Scale</b>                 |                  |
| 1 – death                                             | 56 (8%)          |
| 2 – vegetative state                                  | 2 (0.3%)         |
| 3 – severe disability                                 | 31 (4%)          |
| 4 – moderate disability                               | 139 (19%)        |
| 5 – good recovery                                     | 513 (69%)        |

**Supplementary table 3:** Summary of cohorts with available human genotype data. The first section shows cohorts with full genotype data where we performed a GWAS; the second section is cohorts with the summary statistics from an existing GWAS used in meta-analysis only. Sample numbers are after QC.

| Cohort                   | Country     | Age          | Data                | Samples | Phenotype               |
|--------------------------|-------------|--------------|---------------------|---------|-------------------------|
| MeninGene                | Netherlands | Adults       | Illumina Omni array | 1 149   | Meningitis              |
|                          |             |              |                     | 732     | Pneumococcal meningitis |
|                          |             |              |                     | 277     | Unfavourable outcome    |
| ALS & BPROOF<br>Benfield | Netherlands | Adults       | Illumina Omni array | 4 836   | Controls                |
|                          |             |              |                     | Denmark | Children                |
|                          |             |              |                     |         | 873                     |
| GOYA<br>UK Biobank       | Denmark     | Young adults | Illumina quad array | 2 805   | Controls                |
|                          |             |              |                     | UK      | Adults                  |
|                          |             |              |                     |         | 336 928                 |
| 23andme                  | European    | All          | Summary statistics  | 842     | Bacterial meningitis    |
|                          |             |              |                     | 82 778  | Controls                |
| GenOSept                 | European    | Adults       | Summary statistics  | 220     | Pneumococcal bacteremia |
| WTCCC                    | UK          | Adults       | Summary statistics  | 2 244   | Controls                |

**Supplementary table 4:** Common variation associated with invasiveness using FaST-LMM. Genes are annotated if the significant locus overlaps it, and intergenic variants are annotated with the nearest downstream genes as noted. Gene ID is the name in the ATCC 700669 reference if present; “core” refers to whether this gene was in the core genome; method describes the type of variant that was found to be associated. No antigen alleles or CNVs were found to be associated.

| Gene ID       | Annotation                                                                     | Core | Method          | p-value               |
|---------------|--------------------------------------------------------------------------------|------|-----------------|-----------------------|
| FM211187.6011 | <i>tlyC</i> ; Membrane protein (upstream)                                      | Yes  | Mapped variants | $7.7 \times 10^{-31}$ |
| FM211187.977  | <i>pbpX</i> ; penicillin binding protein                                       | Yes  | Mapped variants | $3.6 \times 10^{-18}$ |
| FM211187.313  | hypothetical protein (upstream)                                                | Yes  | Mapped variants | $2 \times 10^{-16}$   |
| FM211187.1802 | <i>yhfE</i> ; Aminopeptidase (upstream)                                        | Yes  | Mapped variants | $1.0 \times 10^{-9}$  |
| FM211187.1019 | <i>wzh</i> ; capsule synthesis                                                 | No   | Mapped variants | $3.6 \times 10^{-9}$  |
| FM211187.150  | <i>comA</i> ; bacteriocin/competence (upstream)                                | Yes  | Mapped variants | $9.9 \times 10^{-9}$  |
| FM211187.3083 | <i>pbl3e/pldT</i> ; bacteriocin transcriptional regulator (pseudogene)         | No   | COG absent      | $4.0 \times 10^{-10}$ |
| N/A           |                                                                                | No   | COG absent      | $1.4 \times 10^{-8}$  |
| FM211187.3090 | bacteriocin precursor                                                          | No   | COG absent      | $1.7 \times 10^{-8}$  |
| FM211187.6181 | FtsX-family transport protein (ABC transporter permease)                       | No   | COG alleles     | $4.7 \times 10^{-9}$  |
| FM211187.6189 | C4-dicarboxylate (citrate) ABC transporter                                     | Yes  | COG alleles     | $1.4 \times 10^{-7}$  |
| FM211187.5843 | 23S rRNA (uracil-5-)-methyltransferase RumA2                                   | Yes  | COG alleles     | $5.5 \times 10^{-7}$  |
| FM211187.939  | galactose-6-phosphate isomerase                                                | No   | K-mers          | $3.0 \times 10^{-60}$ |
| N/A           | phage-related chromosomal island protein                                       | No   | K-mers          | $3.0 \times 10^{-60}$ |
| FM211187.4259 | Peptidase U32                                                                  | Yes  | K-mers          | $1.7 \times 10^{-59}$ |
| FM211187.4090 | <i>aroK</i> ; Shikimate kinase                                                 | Yes  | K-mers          | $1.7 \times 10^{-59}$ |
| FM211187.1923 | <i>yehU</i> ; Sensor kinase                                                    | Yes  | K-mers          | $3.1 \times 10^{-59}$ |
| FM211187.6369 | <i>patA</i> ; efflux pump (upstream)                                           | Yes  | K-mers          | $2.0 \times 10^{-54}$ |
| FM211187.6823 | <i>tauA</i> ; Nitrate/sulfonate/taurine ABC transporter solute-binding protein | Yes  | K-mers          | $1.9 \times 10^{-43}$ |
| FM211187.213  | Galactose uptake PTS transporter, IIB subunit                                  | Yes  | K-mers          | $2.5 \times 10^{-42}$ |
| FM211187.3677 | <i>pyrB</i> ; Aspartate carbamoyltransferase PyrB                              | Yes  | K-mers          | $4.6 \times 10^{-38}$ |
| FM211187.6594 | <i>ulaA</i> ; Pentose PTS transporter IIA                                      | Yes  | K-mers          | $3.7 \times 10^{-25}$ |

**Supplementary table 5:** Coding sequences with extreme values of Tajima's  $D$ , with a difference between carriage and invasive isolates as determined by permutation testing.

| Gene ID       | Annotation                                                            | Invasive $D$ | Carriage $D$ | Direction            |
|---------------|-----------------------------------------------------------------------|--------------|--------------|----------------------|
| FM211187.1040 | <i>wzx</i> ; capsule synthesis                                        | -2.53094     | -1.79867     | Negative in invasive |
| FM211187.5843 | 23S rRNA (uracil-5-)-methyltransferase RumA2                          | -2.4028      | -1.63478     | Negative in invasive |
| FM211187.2360 | <i>ezrA</i> ; septation ring formation regulator                      | -1.1051      | -2.17726     | Negative in carriage |
| FM211187.4024 | replication initiator protein (on ICE)                                | -1.55767     | -2.16733     | Negative in carriage |
| FM211187.4026 | hypothetical, contains FtsK gamma domain (on ICE)                     | -1.61993     | -2.21525     | Negative in carriage |
| FM211187.357  | bacteriocin                                                           | 4.19212      | 1.30796      | Positive in invasive |
| FM211187.420  | <i>tsaB</i> ; tRNA threonylcarbamoyladenosine biosynthesis protein    | 3.49345      | 1.39805      | Positive in invasive |
| FM211187.769  | acetyltransferase                                                     | 2.9055       | 1.80787      | Positive in invasive |
| FM211187.1019 | <i>wzh</i> ; capsule synthesis                                        | 2.76882      | 1.63677      | Positive in invasive |
| FM211187.1802 | <i>yhfE</i> ; Aminopeptidase                                          | 2.28654      | 1.19784      | Positive in invasive |
| FM211187.1804 | bacteriocin                                                           | 1.94491      | -0.56384     | Positive in invasive |
| FM211187.1806 | <i>dacC</i> ; D-alanyl-D-alanine carboxypeptidase                     | 2.23028      | 0.722447     | Positive in invasive |
| FM211187.5184 | <i>dnaI</i> ; primosomal protein                                      | 2.32212      | 0.197632     | Positive in invasive |
| FM211187.3651 | <i>tarI</i> ;                                                         | -0.146237    | 2.34171      | Positive in carriage |
| FM211187.3804 | Ribitol-5-phosphate cytidyltransferase<br><i>nanB</i> ; neuraminidase | 1.6805       | 3.19937      | Positive in carriage |
| FM211187.5053 | membrane protein                                                      | 0.311619     | 2.46774      | Positive in carriage |
| FM211187.5358 | <i>secY</i> ; accessory secretion system translocase                  | 0.471641     | 2.36541      | Positive in carriage |

**Supplementary table 6:** Burden testing of rare LoF and damaging variants in coding sequences associated with invasive or carriage isolates. P-values are corrected for multiple testing using a Bonferroni correction with the total number of genes.

| Gene ID       | Annotation                                           | p-value | Class    | Direction |
|---------------|------------------------------------------------------|---------|----------|-----------|
| FM211187.1036 | <i>wchV</i> ; capsule synthesis                      | 0.0022  | LoF      | Carriage  |
| FM211187.1143 | membrane protein                                     | 0.0022  | LoF      | Carriage  |
| FM211187.1634 | <i>bglG</i> ; transcription antiterminator           | 0.0022  | LoF      | Carriage  |
| FM211187.3315 | <i>zmpD</i> ; zinc metalloprotease                   | 0.0022  | LoF      | Carriage  |
| FM211187.4588 | <i>pclA</i> ; collagen-like surface-anchored protein | 0.0022  | LoF      | Carriage  |
| FM211187.4679 | platelet binding phage protein                       | 0.0022  | LoF      | Carriage  |
| FM211187.4714 | prophage protein                                     | 0.0022  | LoF      | Carriage  |
| FM211187.4939 | membrane protein                                     | 0.0022  | LoF      | Carriage  |
| FM211187.5113 | <i>nanA</i> ; neuraminidase                          | 0.0022  | LoF      | Carriage  |
| FM211187.5328 | uncharacterised repeat protein                       | 0.0022  | LoF      | Carriage  |
| FM211187.5369 | PsrP glycosyltransferase                             | 0.0045  | LoF      | Carriage  |
| FM211187.6773 | <i>dusB</i> ; tRNA-dihydrouridine synthase           | 0.0045  | LoF      | Carriage  |
| FM211187.1025 | <i>wze</i> ; capsule synthesis                       | 0.0067  | LoF      | Carriage  |
| FM211187.4017 | hypothetical protein (on ICE)                        | 0.0067  | LoF      | Carriage  |
| FM211187.1040 | <i>wzx</i> ; capsule synthesis                       | 0.0089  | LoF      | Carriage  |
| FM211187.92   | cell wall-binding amidase/autolysin (pseudogene)     | 0.0089  | LoF      | Carriage  |
| FM211187.6861 | <i>comFC</i> ; competence                            | 0.011   | LoF      | Carriage  |
| FM211187.6608 | <i>pcpA</i> ; choline binding protein                | 0.016   | LoF      | Carriage  |
| FM211187.4717 | prophage protein                                     | 0.018   | LoF      | Carriage  |
| FM211187.2642 | chlorohydrolase                                      | 0.029   | LoF      | Carriage  |
| FM211187.5374 | PsrP glycosyltransferase                             | 0.038   | LoF      | Carriage  |
| FM211187.1804 | bacteriocin                                          | 0.039   | LoF      | Carriage  |
| FM211187.3950 | conjugal transfer protein (on ICE)                   | 0.042   | LoF      | Carriage  |
| FM211187.3204 | <i>ybaB</i> ; DNA-binding protein                    | 0.0089  | Damaging | Carriage  |
| FM211187.4311 | multidrug transporter                                | 0.050   | Damaging | Carriage  |
| FM211187.4424 | sortase-sorted surface anchored protein (pseudogene) | 0.0067  | LoF      | Invasive  |
| FM211187.2661 | <i>bceA</i> ; ABC exporter ATPase                    | 0.0045  | Damaging | Invasive  |
| FM211187.3585 | <i>smc</i> ; Chromosome partition protein            | 0.0045  | Damaging | Invasive  |

|               |                                                      |        |          |          |
|---------------|------------------------------------------------------|--------|----------|----------|
| FM211187.5524 | <i>trpD</i> ; anthranilate phosphoribosyltransferase | 0.0045 | Damaging | Invasive |
| FM211187.2550 | <i>fruA</i> ; Fructose PTS ABC transporter           | 0.027  | Damaging | Invasive |
| FM211187.3460 | <i>ispA</i> ; Farnesyl diphosphate synthase          | 0.038  | Damaging | Invasive |
| FM211187.2615 | <i>pfkA</i> ; ATP-dependent 6-phosphofructokinase    | 0.042  | Damaging | Invasive |

---

**Supplementary table 7:** Antigen classification of *pspA*, *pspC* and *zmpA*. The total number of samples in the genome-to-genome analysis with each allele is shown, and those where an association test performed are noted.

| Antigen     | Allele | Samples | Tested |
|-------------|--------|---------|--------|
| <i>pspA</i> | 1      | 214     | ✓      |
|             | 2      | 231     | ✓      |
|             | 3      | 1       | -      |
|             | 4      | 1       | -      |
| <i>cbpA</i> | 0      | 44      | ✓      |
|             | 1      | 6       | -      |
|             | 2      | 17      | -      |
|             | 3      | 84      | ✓      |
|             | 4      | 45      | ✓      |
|             | 5      | 60      | ✓      |
| <i>pspC</i> | 6      | 191     | ✓      |
|             | 0      | 347     | ✓      |
|             | 7      | 7       | -      |
|             | 8      | 39      | ✓      |
|             | 9      | 45      | ✓      |
|             | 10     | 6       | -      |
| <i>zmpA</i> | 11     | 3       | -      |
|             | 1      | 26      | -      |
|             | 2      | 236     | ✓      |
|             | 3      | 185     | ✓      |



**Supplementary table 8:** Number of samples in each population cluster. Cluster two is a polyphyletic “bin” cluster. The dominant serotypes for each cluster, where they account for > 50% of the isolates, are listed.

| Cluster | Serotype   | Samples | Tested |
|---------|------------|---------|--------|
| 1       | 4          | 17      | -      |
| 2       | -          | 145     | ✓      |
| 3       | 8/11A/33F  | 49      | ✓      |
| 4       | 10A/35F    | 22      | -      |
| 5       | 23A/B/F    | 32      | ✓      |
| 6       | 6B         | 14      | -      |
| 7       | 22F        | 39      | ✓      |
| 8       | 9N/15B/19A | 47      | ✓      |
| 9       | 3          | 47      | ✓      |
| 10      | 7F         | 55      | ✓      |

**Supplementary table 9:** Comparison of classifiers of antigen alleles. The balanced accuracy is given by the average of  $\frac{1}{2}$ (sensitivity + specificity) for all alleles.

| Method        | Balanced accuracy |
|---------------|-------------------|
| SVM           | 0.86              |
| kkn           | 0.73              |
| Random forest | 0.50              |
| DAPC          | 0.14              |

**Supplementary table 10:** Factors beta values from bolt-lmm were adjusted by, to convert to ORs for meta-analysis.

| Study                         | Adjusted beta factor | N <sub>eff</sub> |
|-------------------------------|----------------------|------------------|
| Dutch meningitis              | 6.44647              | 3713.66          |
| Dutch pneumococcal meningitis | 8.757922             | 2543.069         |
| Danish meningitis             | 4.086244             | 808.5666         |
| Danish bacteremia             | 5.524288             | 2663.148         |
| 23andme                       | NA                   | 3334.086         |
| GenOSept                      | NA                   | 801.4286         |
| UKB SR meningitis             | 4.080513             | 5157.194         |
| UKB SR sepsis                 | 10.47621             | 1282.525         |
| UKB ICD meningitis            | 5.839719             | 2632.319         |
| UKB ICD all                   | 4.110132             | 5017.843         |

## Supplementary figures

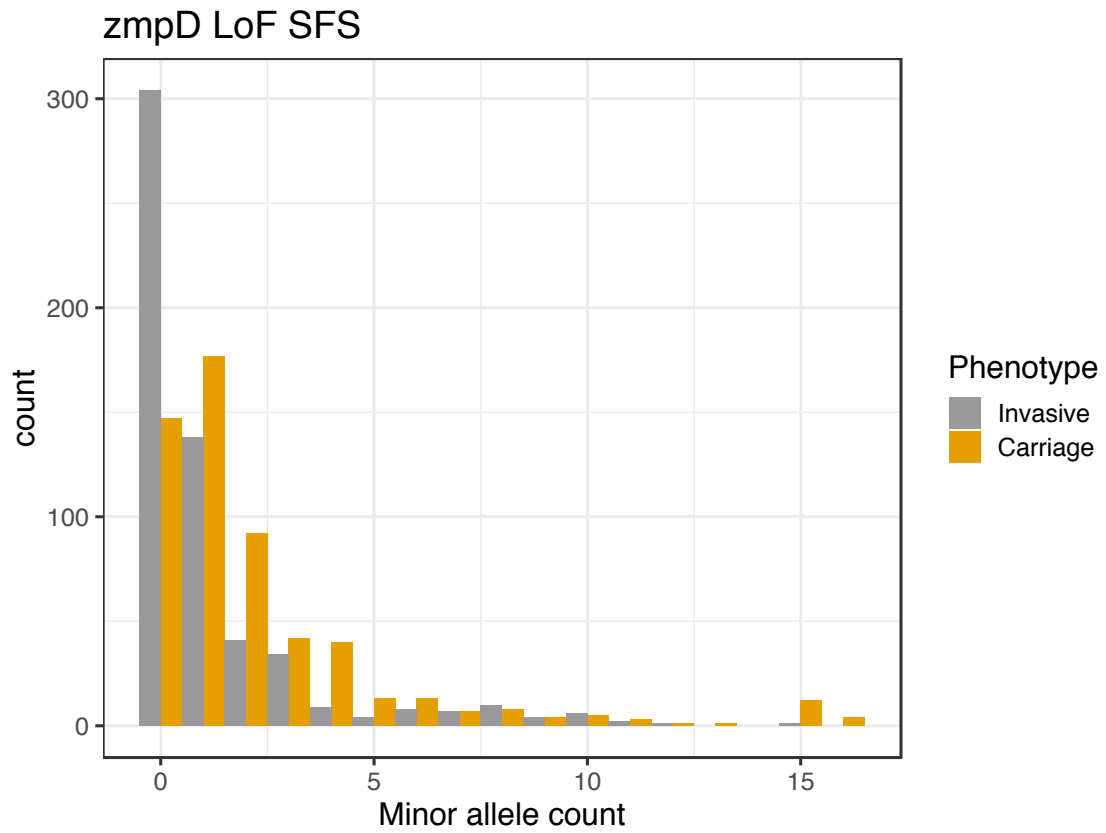

**Supplementary figure 1:** Site frequency spectrum of rare loss of function variants (MAF < 1%) in *zmpD* in the Dutch cohort. Bars are stratified by phenotype (gray – invasive; orange – carriage).

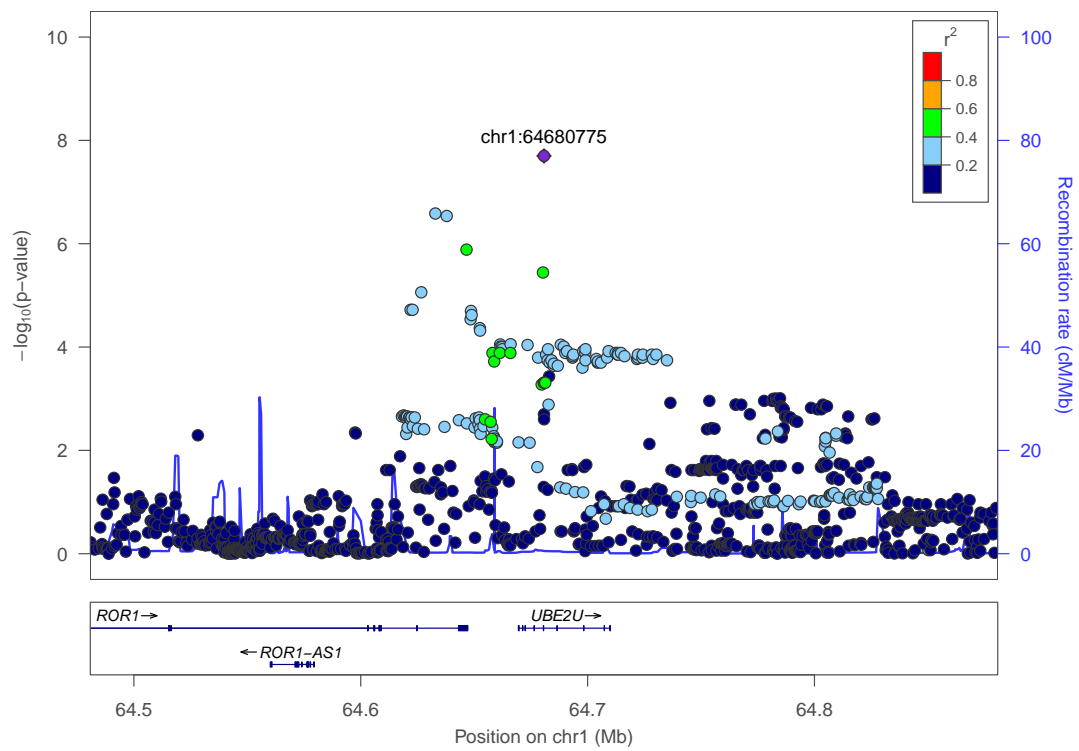

**Supplementary figure 2:** Locuszoom plot of association on chromosome 1 with unfavourable outcome, which is a zoom of the Manhattan plot on the locus. The lead SNP is a purple diamond, other markers are circles coloured by their  $r^2$  with the lead SNP to show LD. The bottom panel shows annotated genes in the region, with exons as boxes and introns as lines. Recombination rate in cM/Mb is plotted as a pale blue line.

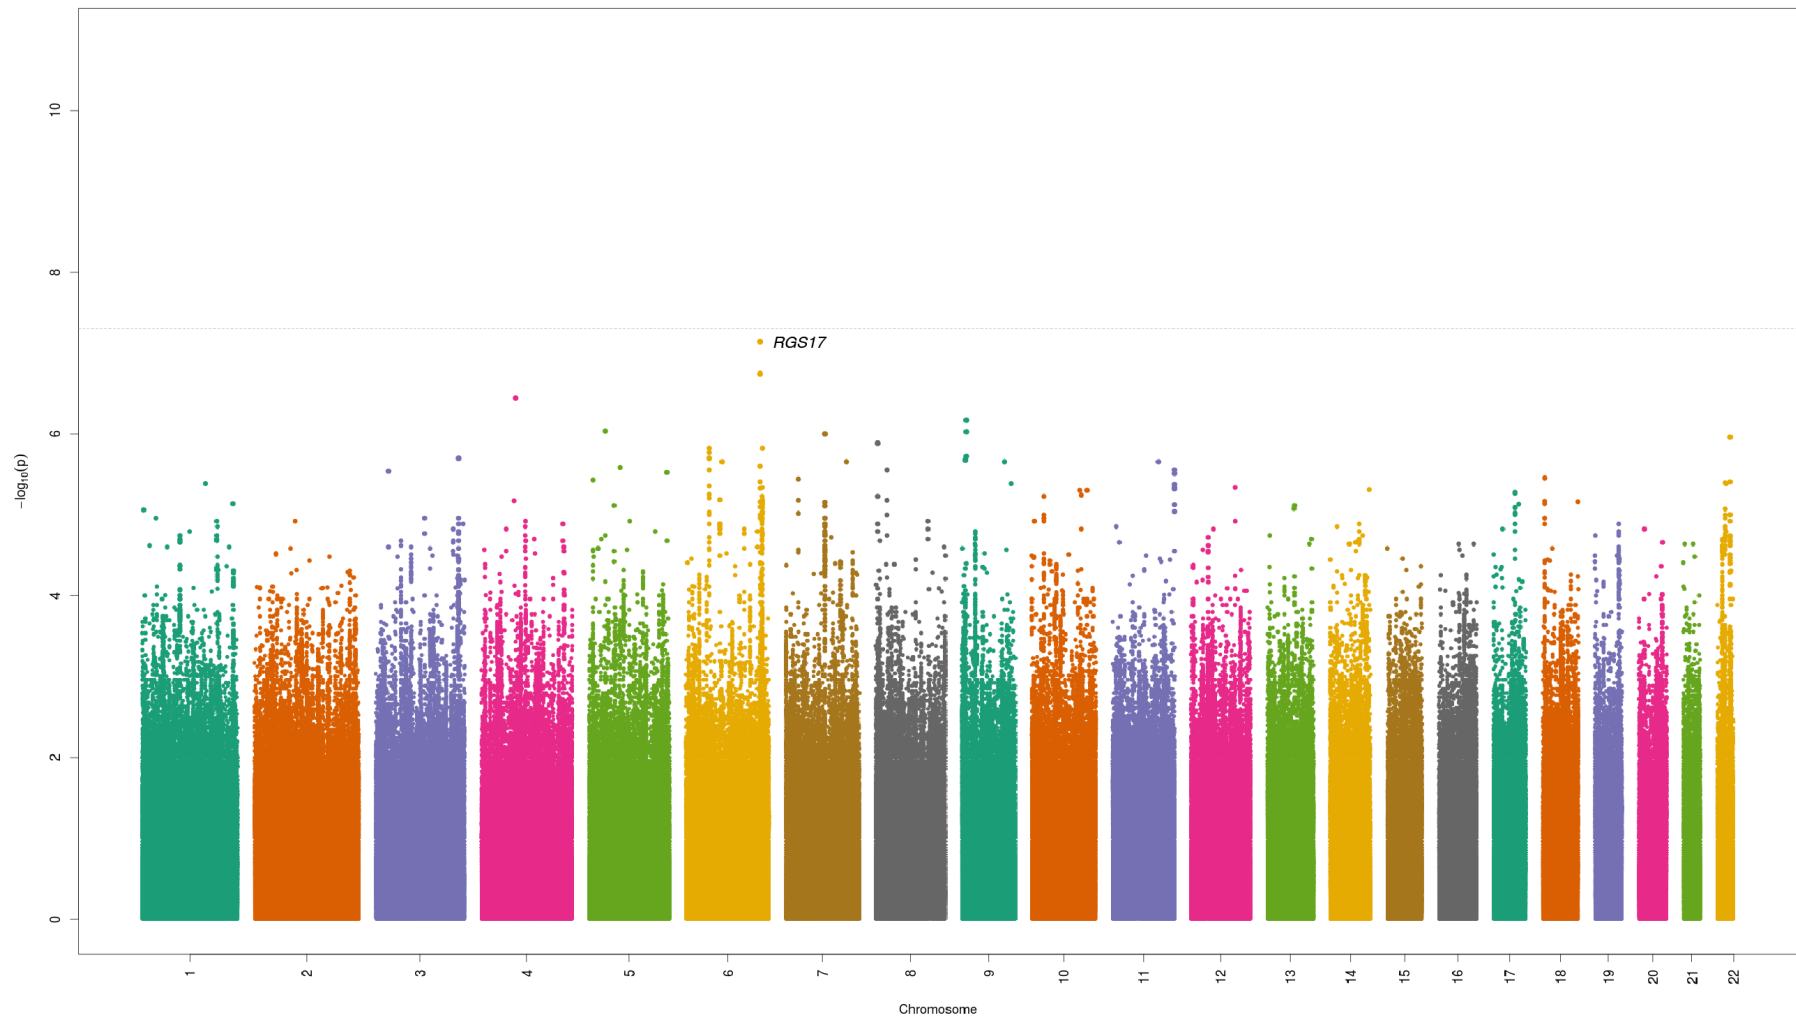

**Supplementary figure 3:** Manhattan plot from GWAS of all Dutch meningitis cases. Y-axis is  $-\log_{10}(p)$  of the association values, x-axis is ordered by marker position on each autosome. Suggestive results are annotated with nearby genes. Genome-wide significance is at  $5 \times 10^{-8}$ .

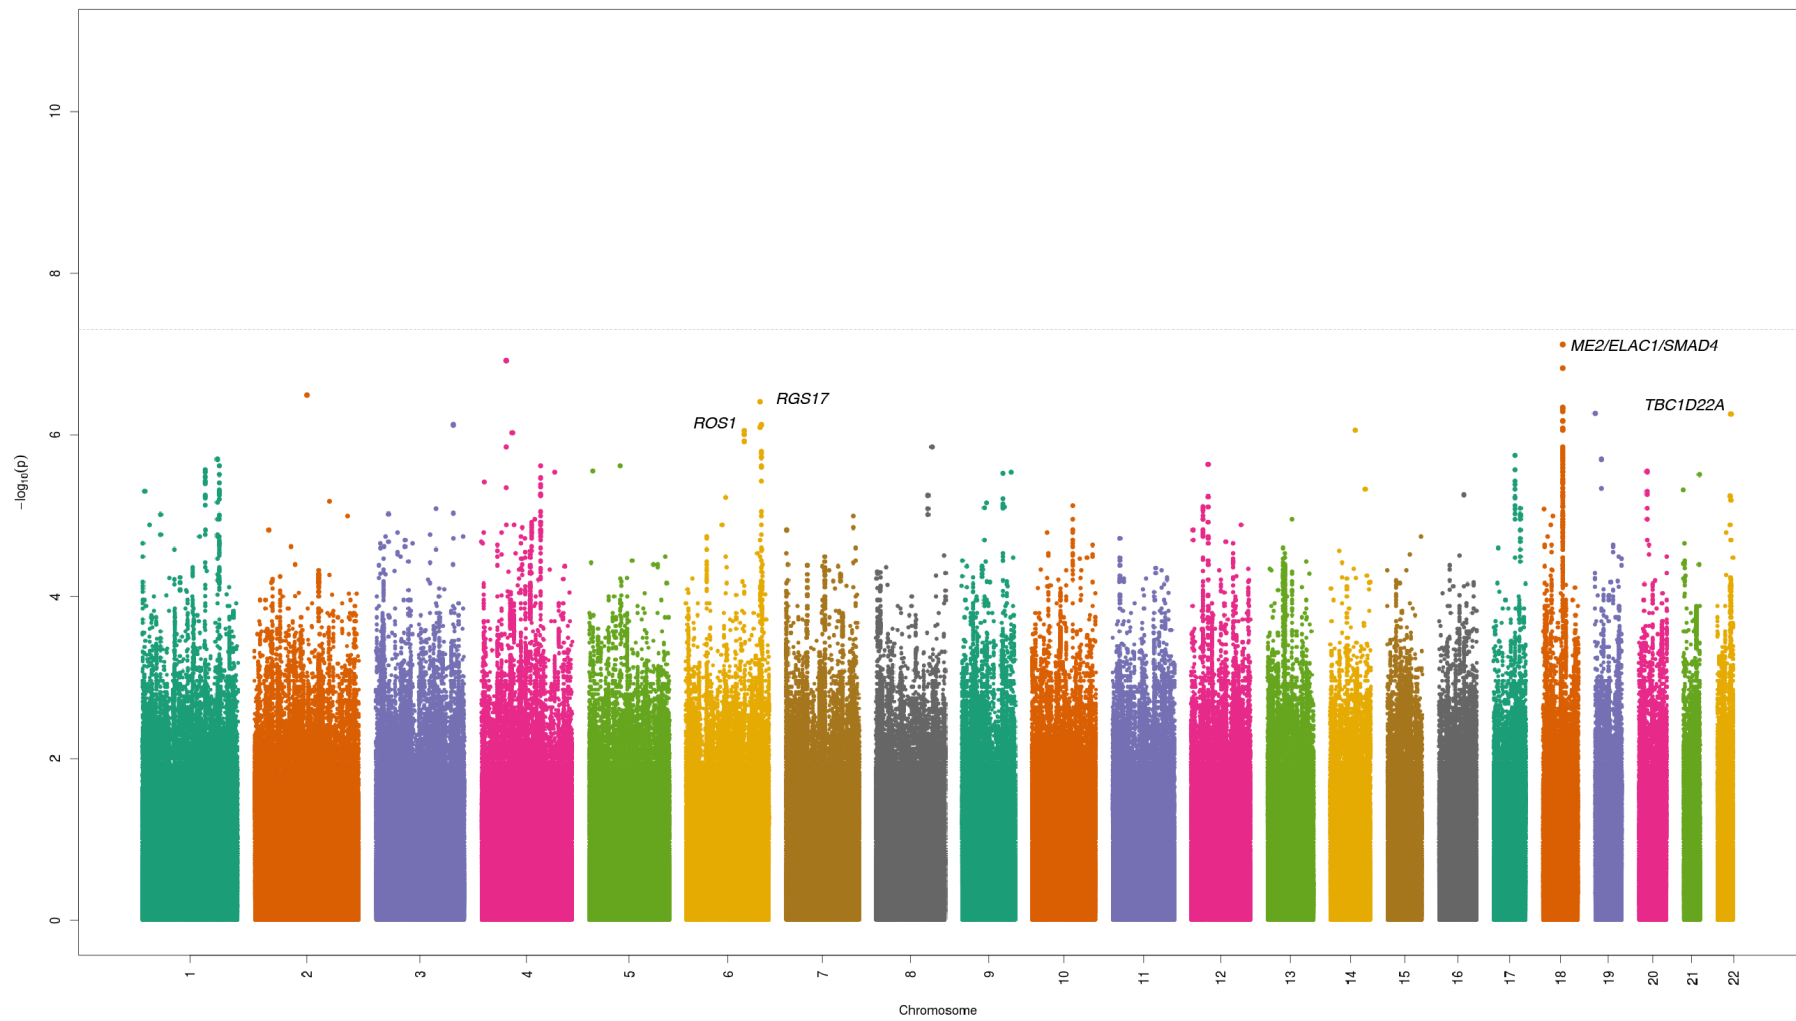

**Supplementary figure 4:** Manhattan plot from GWAS of Dutch pneumococcal meningitis cases. Y-axis is  $-\log_{10}(p)$  of the association values, x-axis is ordered by marker position on each autosome. Suggestive results are annotated with nearby genes. Genome-wide significance is at  $5 \times 10^{-8}$ .

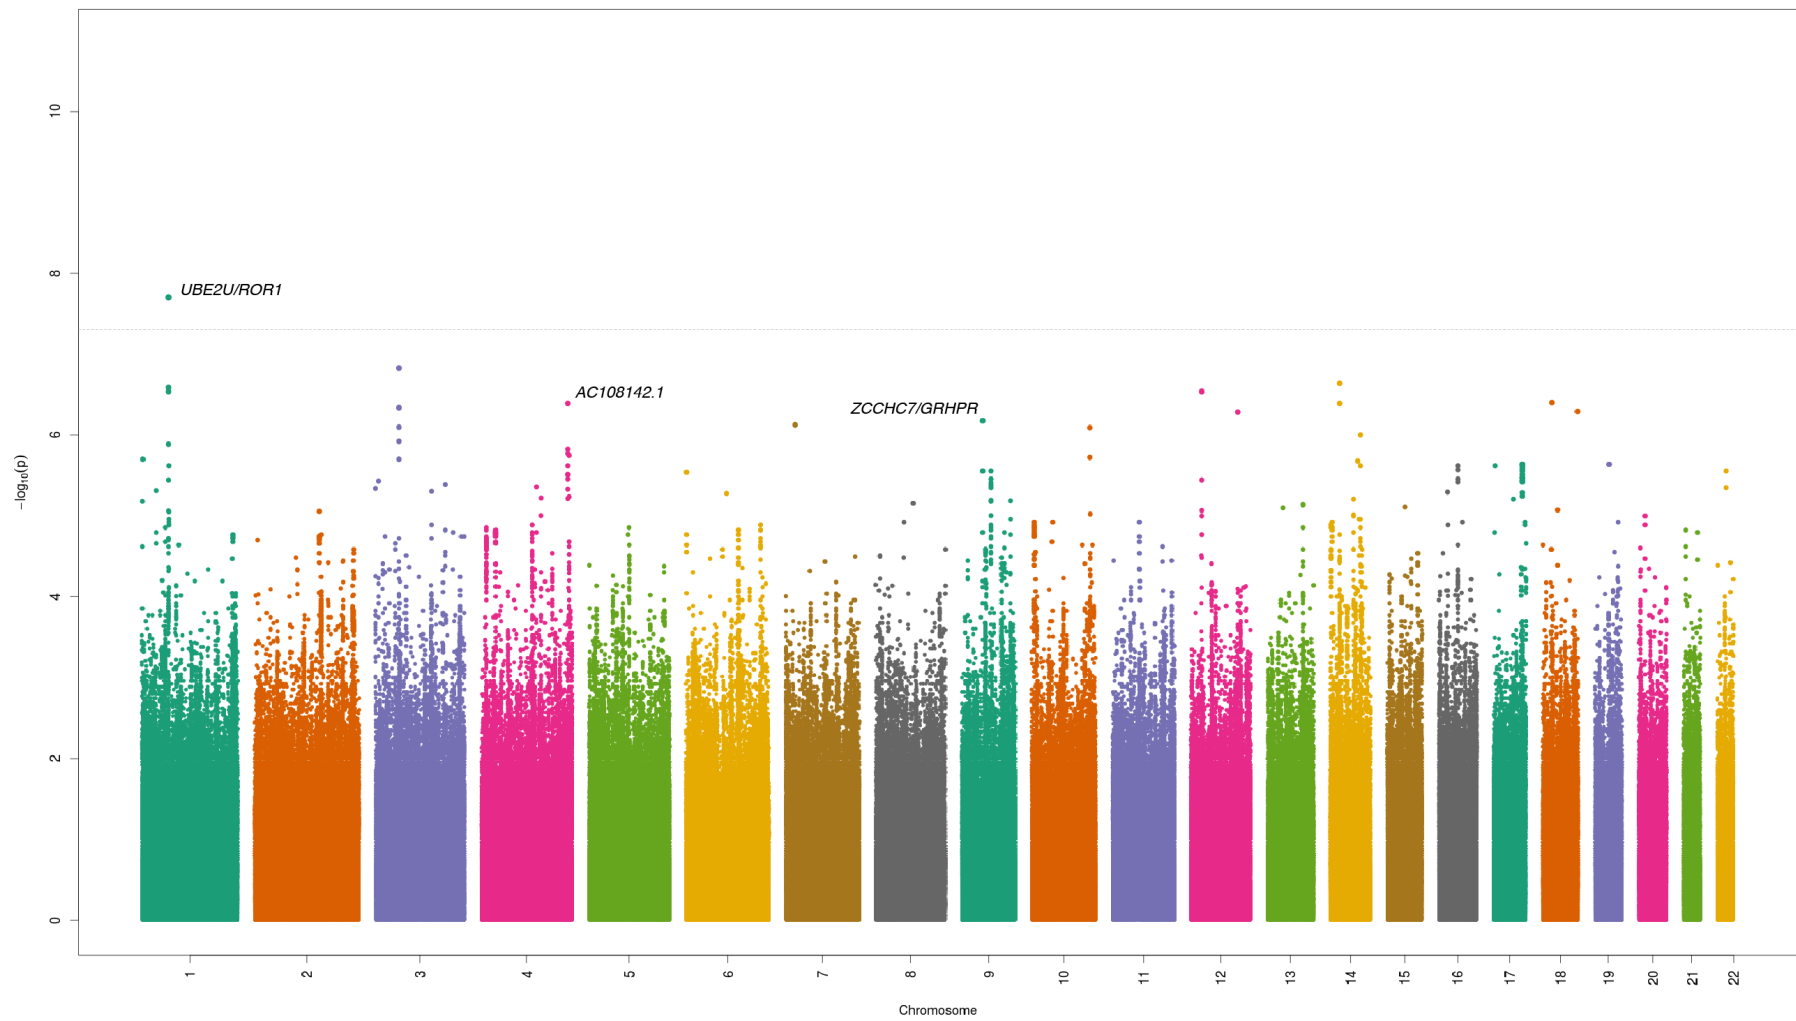

**Supplementary figure 5:** Manhattan plot from GWAS of all Dutch meningitis cases with an unfavourable outcome. Y-axis is  $-\log_{10}(p)$  of the association values, x-axis is ordered by marker position on each autosome. Suggestive results from are annotated with nearby genes. Genome-wide significance is at  $5 \times 10^{-8}$ .



## rs12081070 in Macrophages M1 Tissues

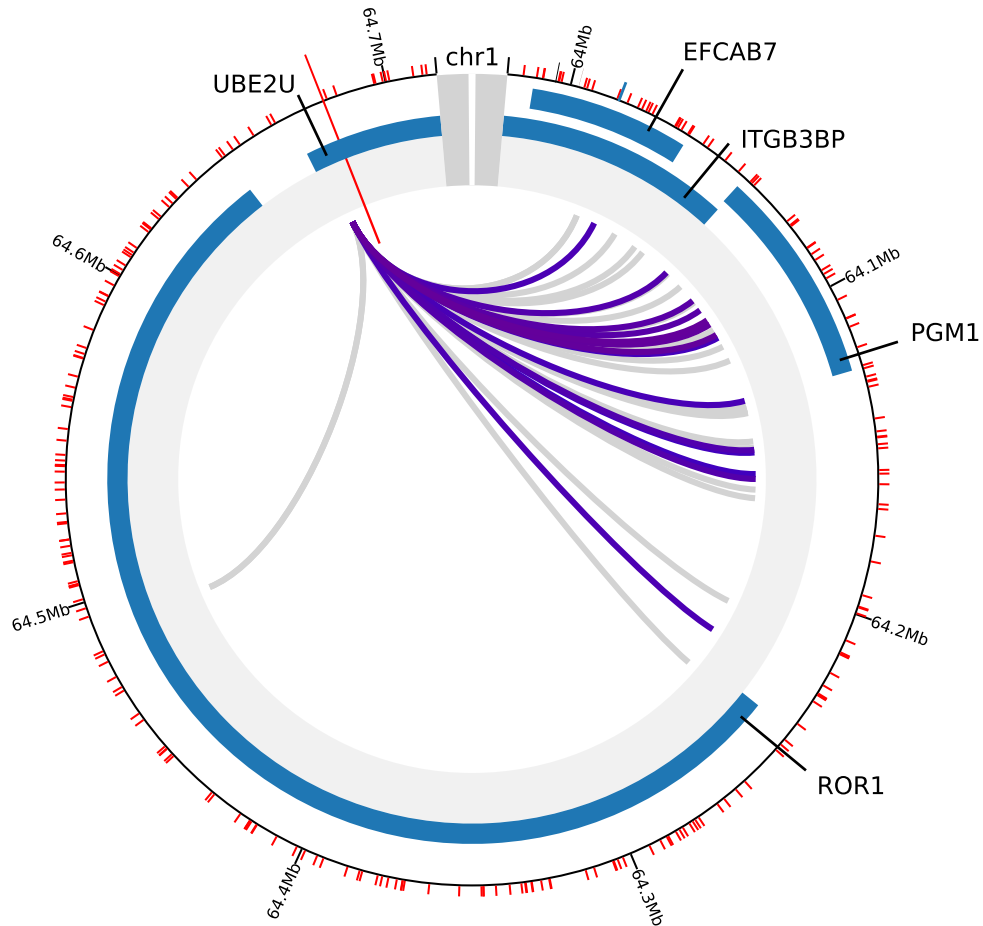

**Supplementary figure 6:** Neighbouring chromatin interactions with rs12081070 *UBE2U* intronic variant in M1 macrophages. A fragment of chromosome 1 is represented by the outermost track with *HindIII* restriction sites highlighted in red ticks with the rs12081070 variant represented by a long straight red line. Protein coding genes are represented by blue bars and central arcs represent interactions coloured by interaction score (grey <5; purple 5-8; red >8). A number of interactions are observed in macrophages between the variant-containing bait including the *UBE2U* gene and *ROR1* and *PGM1* genes.

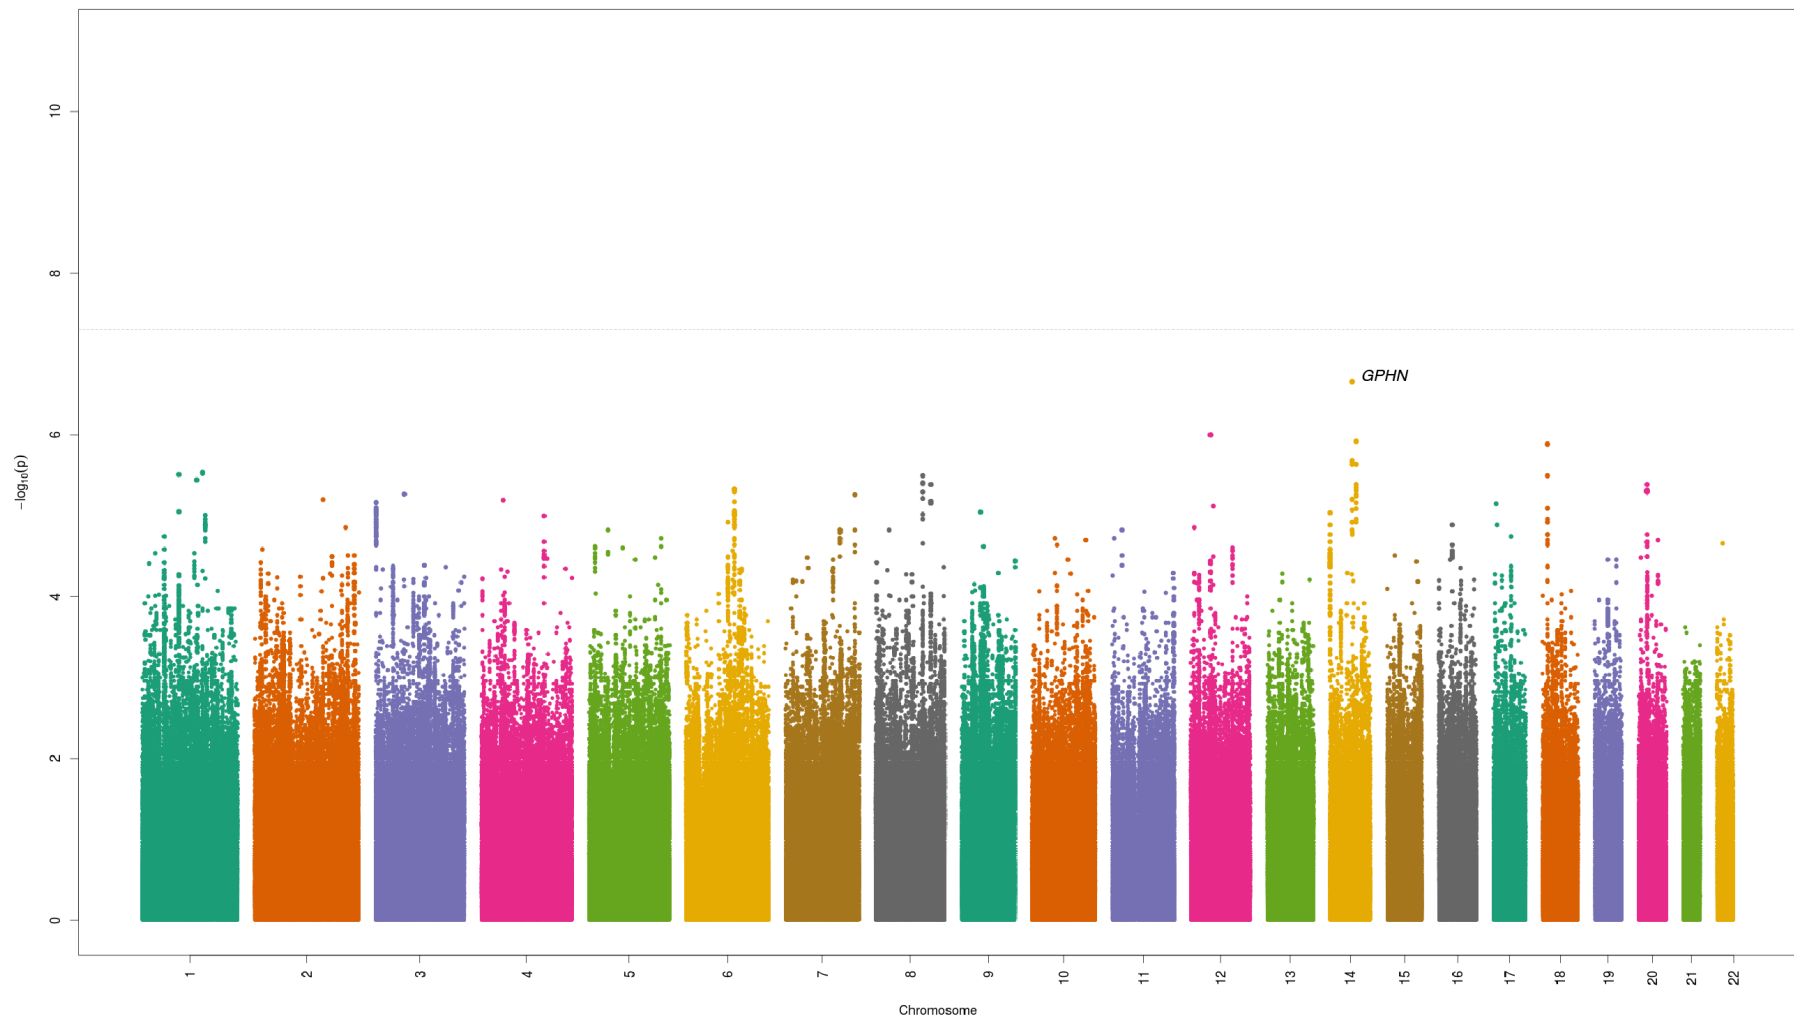

**Supplementary figure 7:** Manhattan plot from GWAS of Danish pneumococcal meningitis cases. Y-axis is  $-\log_{10}(p)$  of the association values, x-axis is ordered by marker position on each autosome. The suggestive results is annotated with nearby genes. Genome-wide significance is at  $5 \times 10^{-8}$ .

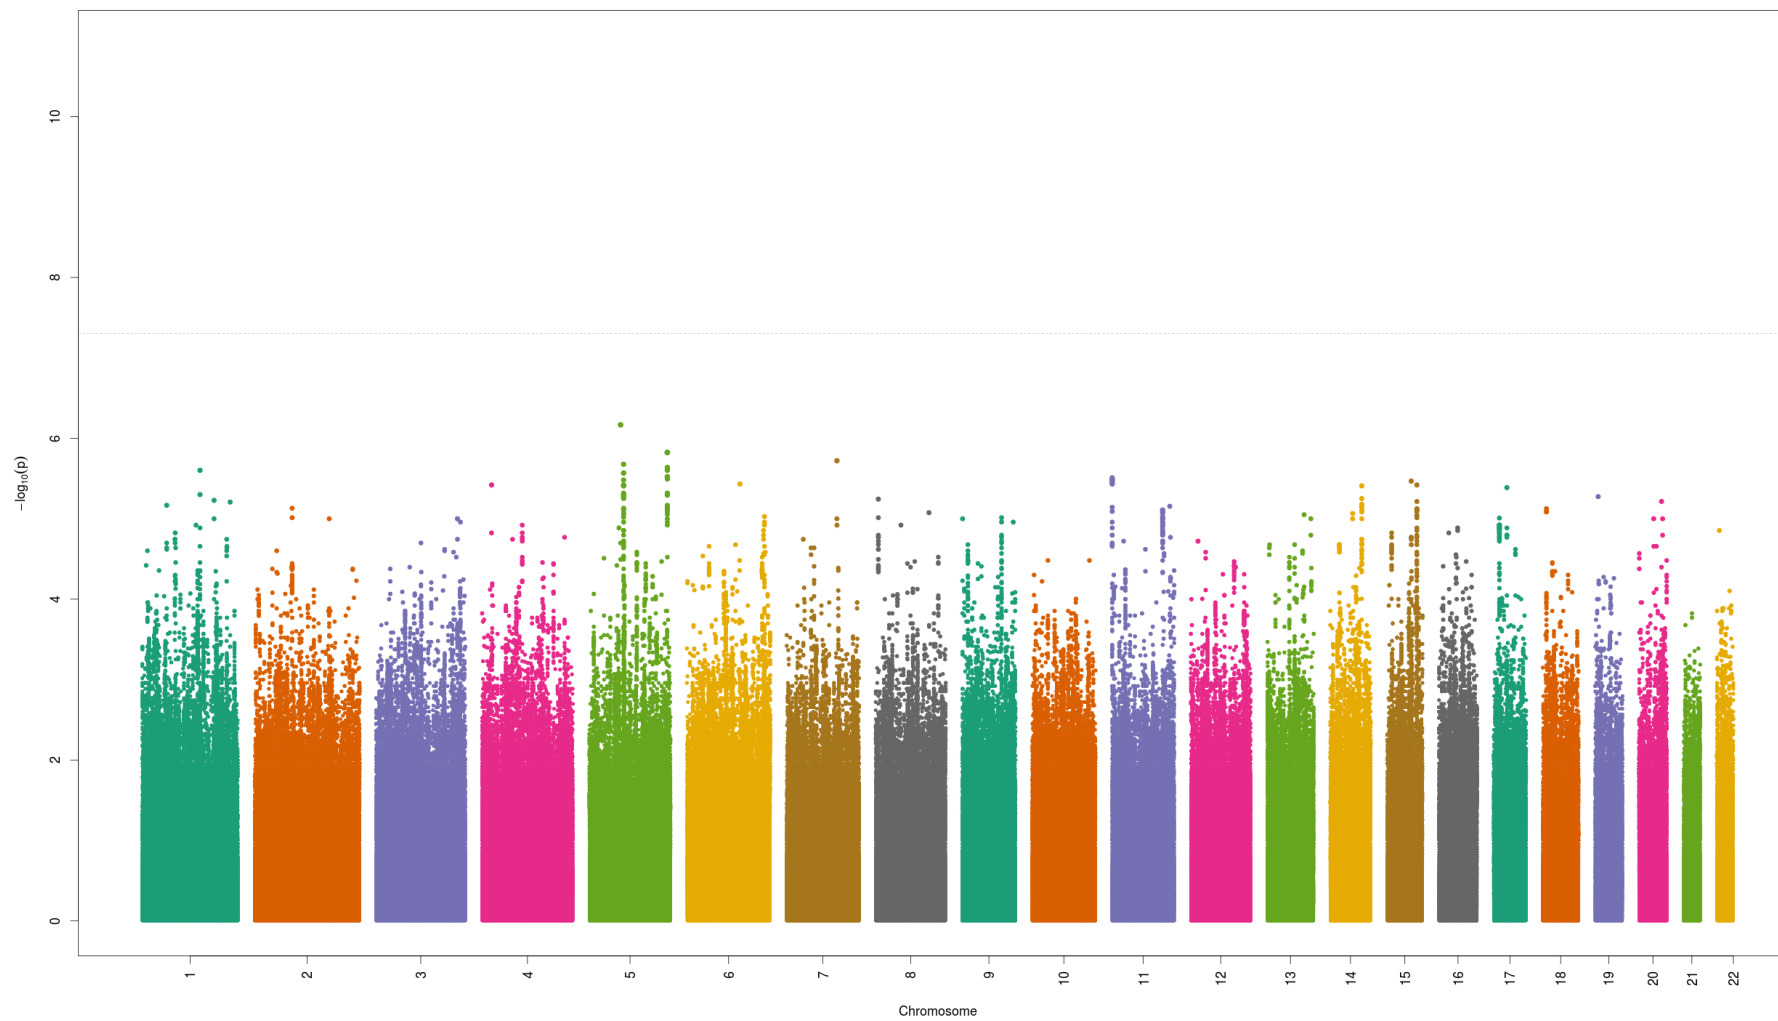

**Supplementary figure 8:** Manhattan plot from GWAS of all Danish pneumococcal bacteremia cases. Y-axis is  $-\log_{10}(p)$  of the association values, x-axis is ordered by marker position on each autosome. Genome-wide significance is at  $5 \times 10^{-8}$ .

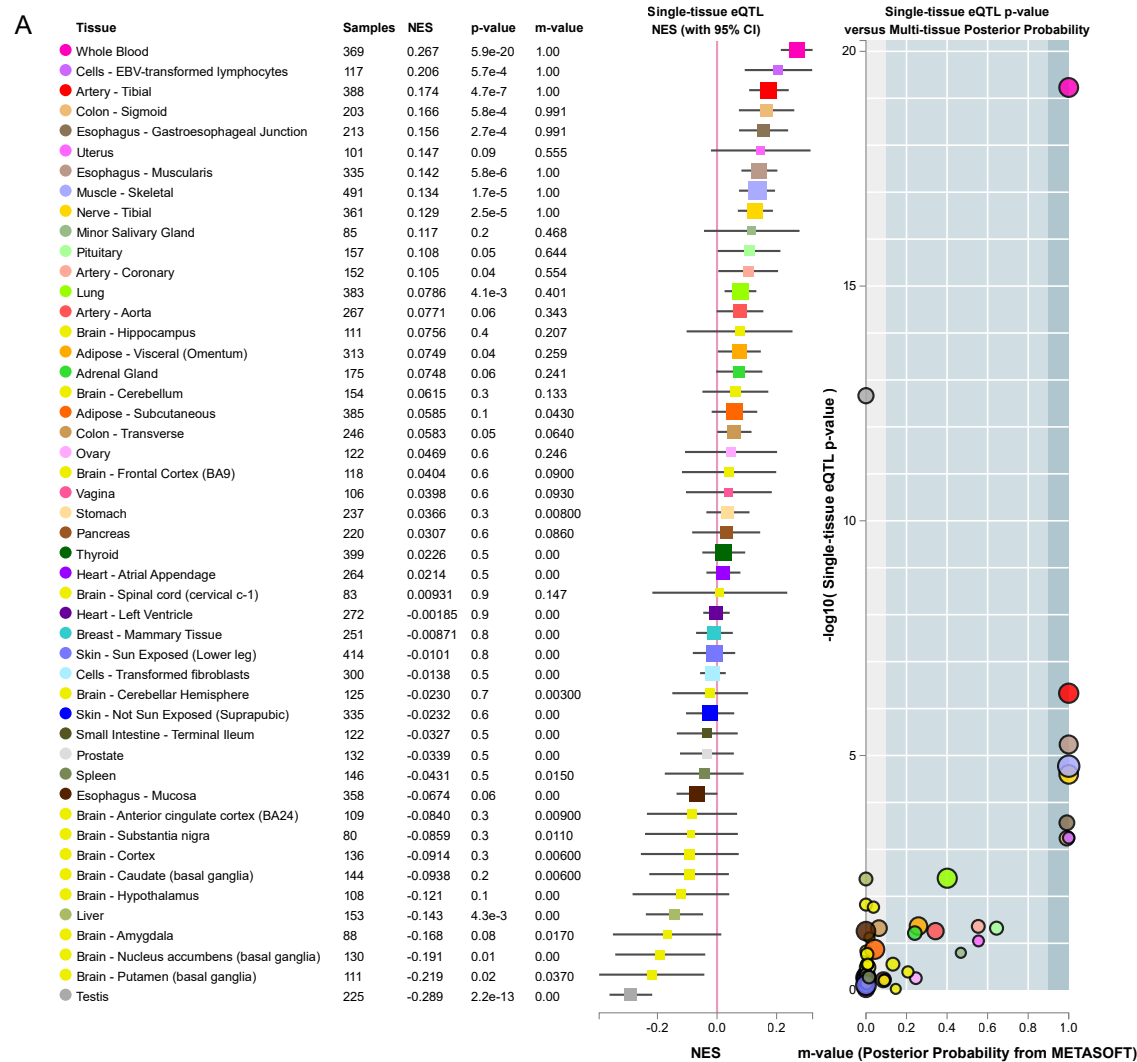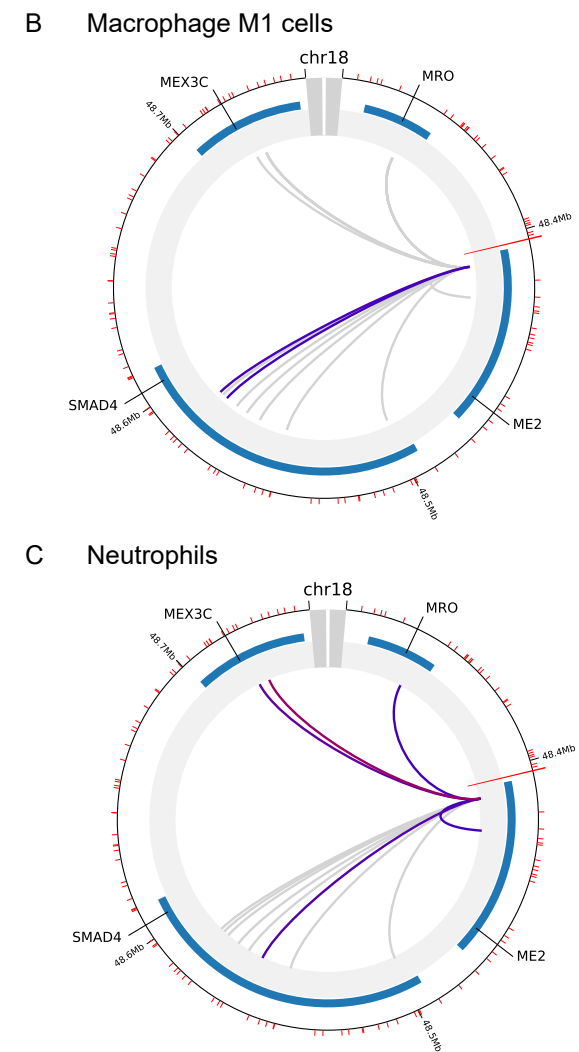

**Supplementary figure 9:** Multi-tissue eQTL and cell-specific chromatin interactions of rs2850542 *ME2* promoter variant. **A**) eQTL effects of the variant on the same gene in a range of tissues with number of samples tested, normalised effect size (NES) and p and m posterior probability values calculated in METASOFT shown numerically and with  $-\log_{10}$  p-values plotted against m-values for each tissue type in the right-hand scatter plot with tissues represented by coloured points sized by sample-size. Chromatin interactions in M1 macrophages (**B**) and neutrophils (**C**) with a fragment of chromosome 18 represented by the outermost track with *HindIII* restriction sites highlighted in red ticks with the rs2850542 variant represented by a long straight red line. Protein coding genes are represented by blue bars and central arcs represent interactions coloured by interaction score (grey <5; purple 5-8; red >8). Consistent interactions are observed between the variant-containing bait including the *ME2* gene and the *SMAD4* gene.

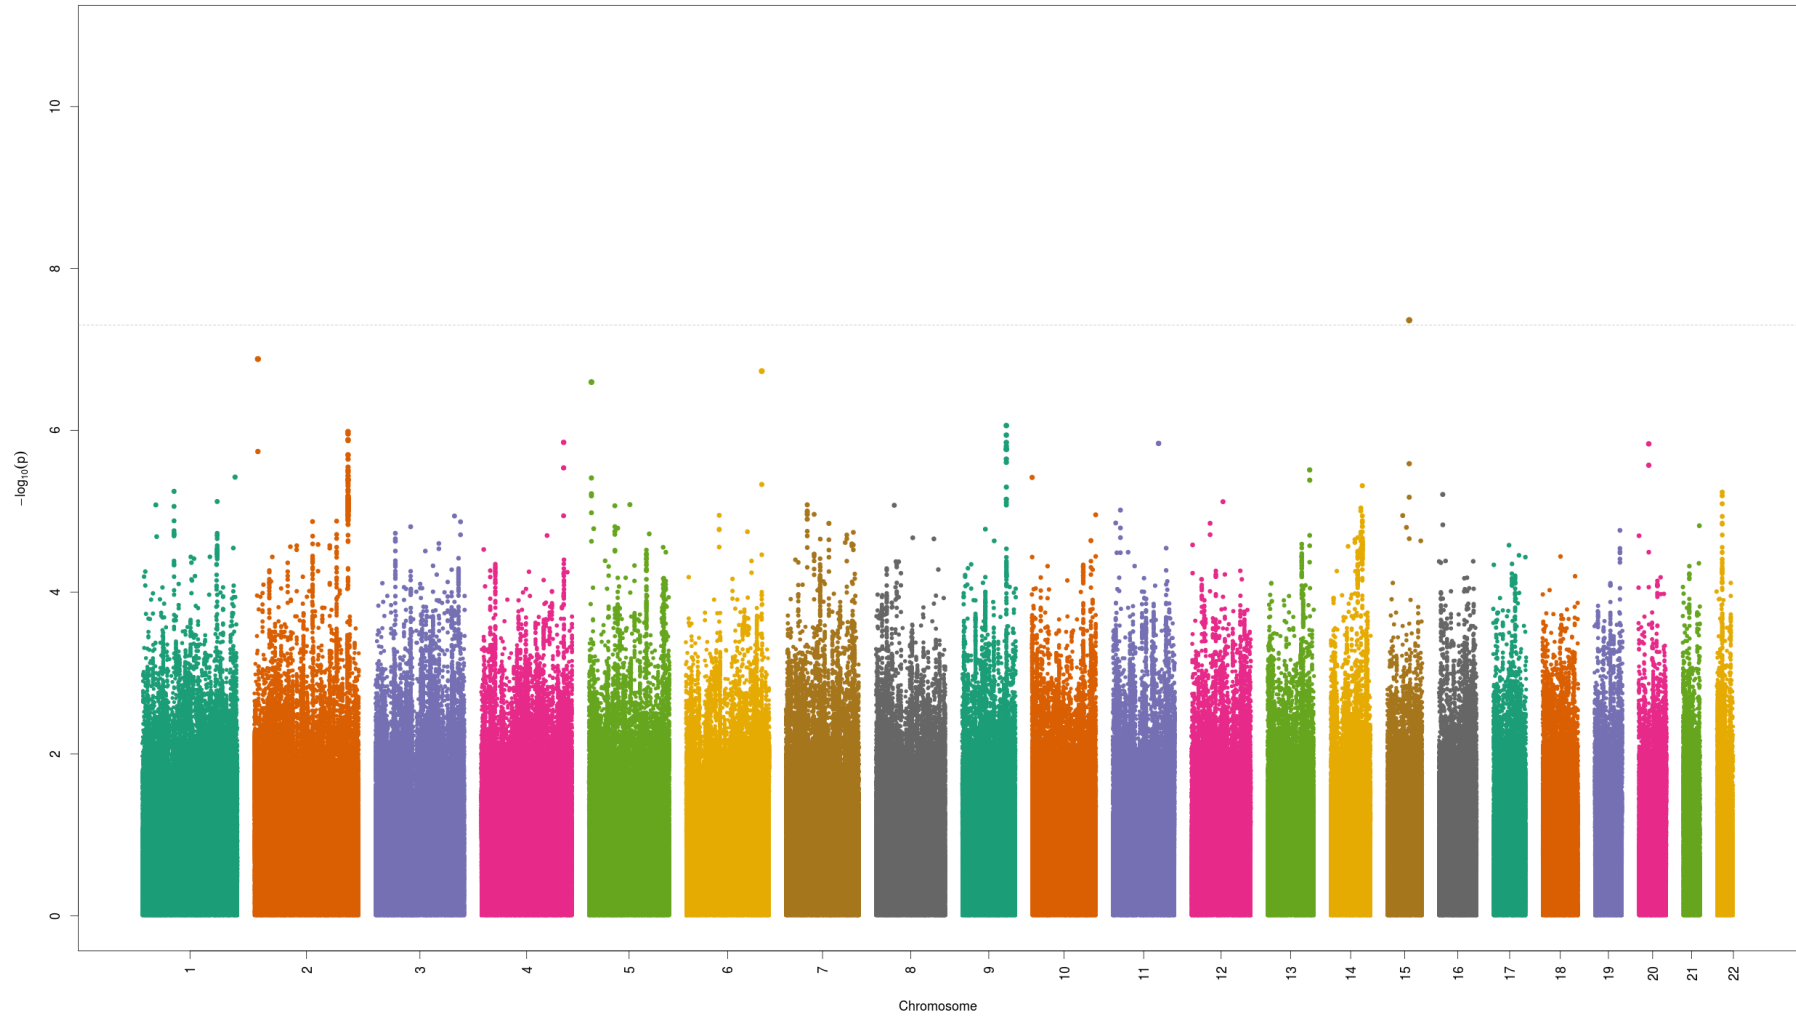

**Supplementary figure 10:** Manhattan plot from meta-analysis of Meningene, Danish and UK biobank (ICD defined) cohorts. Y-axis is  $-\log_{10}(p)$  of the association values, x-axis is ordered by marker position on each autosome. Genome-wide significance is at  $5 \times 10^{-8}$ .

## NL + DK + UKB ICD

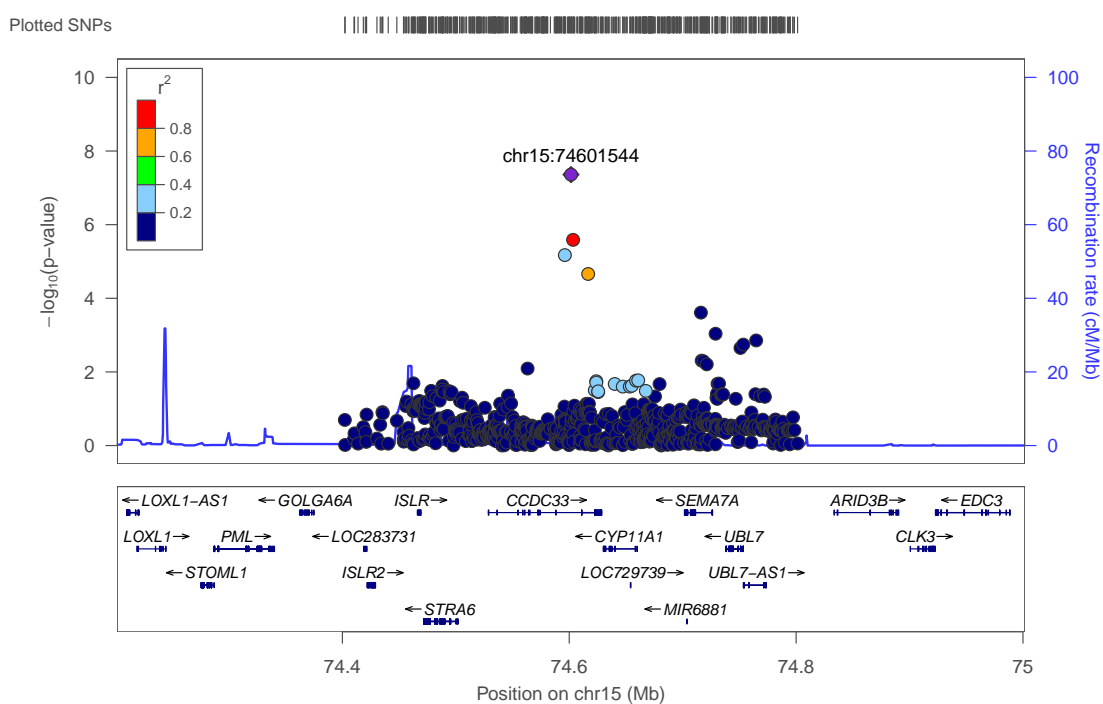

**Supplementary figure 11:** Locuszoom plot of meta-analysis association on chromosome 15 with meningitis susceptibility, which is a zoom of the Manhattan plot on the locus. The lead SNP is a purple diamond, other markers are circles coloured by their  $r^2$  with the lead SNP to show LD. The bottom panel shows annotated genes in the region, with exons as boxes and introns as lines. Recombination rate in cM/Mb is plotted as a pale blue line.

**A Macrophage M2 cells**

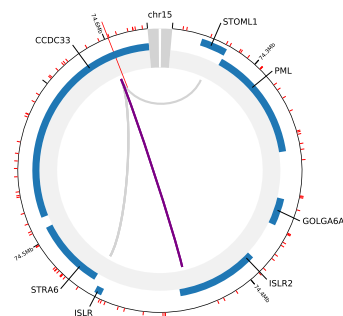

**B CD8 T-cells**

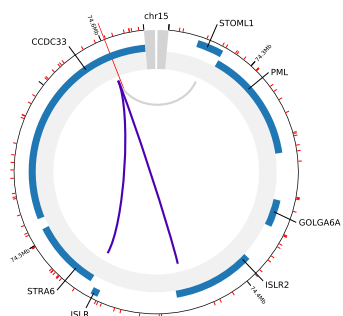

**C**

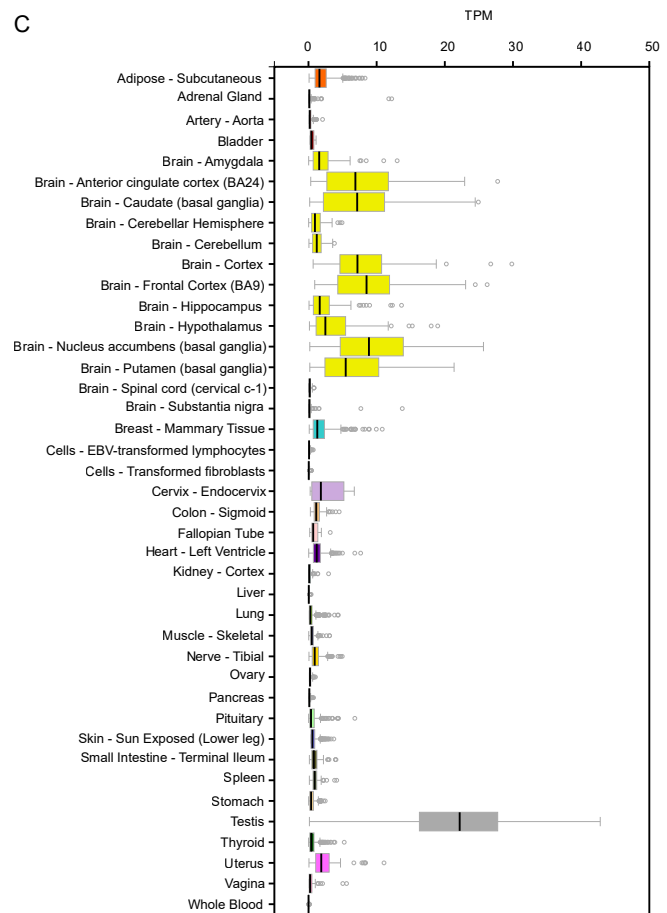

**Supplementary figure 12:** Cell-specific chromatin interactions of the rs116264669 *CCDC33* intronic variant and tissue-specific *ISLR2* gene expression. Chromatin interactions in M2 macrophages (**A**) and CD8 T-cells (**B**) with a fragment of chromosome 15 represented by the outermost track with *HindIII* restriction sites highlighted in red ticks with the rs116264669 variant represented by a long straight red line. Protein coding genes are represented by blue bars and central arcs represent interactions coloured by interaction score (grey <5; purple 5-8; red >8). Consistent interactions are observed between the variant-containing bait including the *CCDC33* gene and the *ISLR2* gene. **C**) Expression levels of the *ISLR2* gene in multiple tissues coloured by tissue type and measured in transcripts per million (TPM) with significant expression levels in neural tissue and testis.

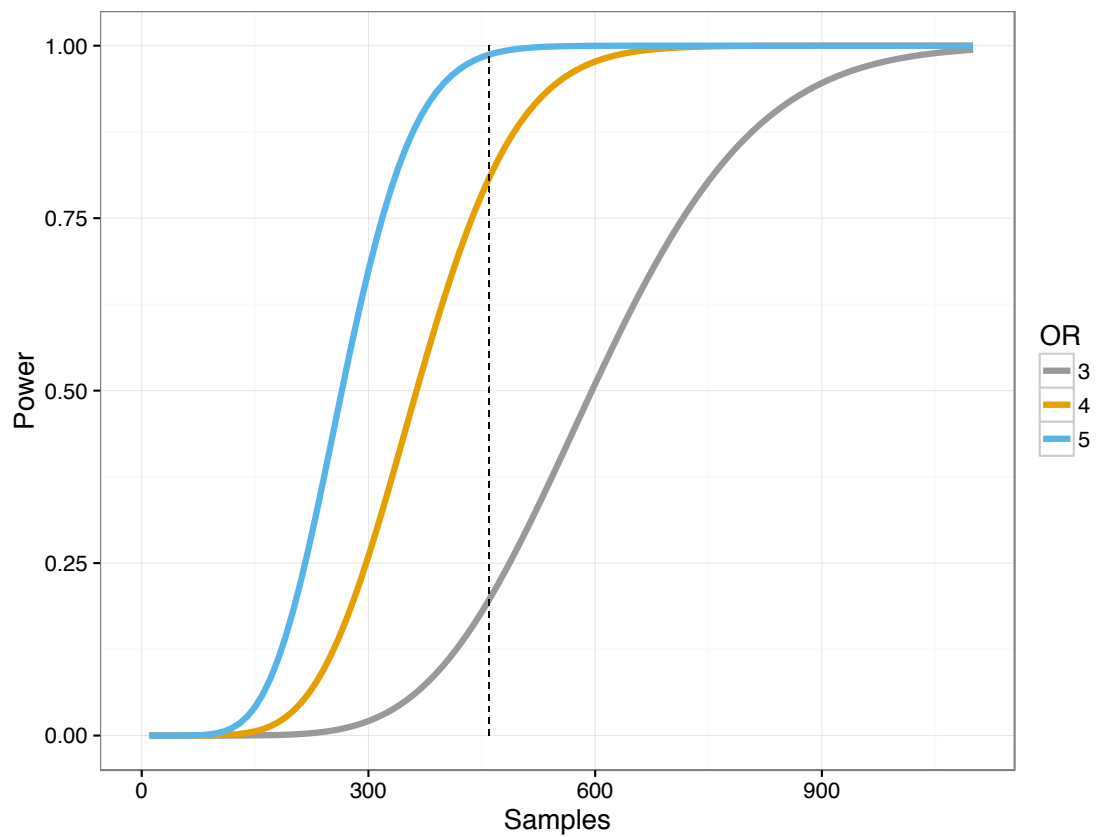

**Supplementary figure 13:** Power for detecting genome-to-genome interactions. Assuming no population structure effect, the power of detecting an correlation between genome positions at 25 % MAF at a range of ORs. The 460 samples we used in this study is marked as a vertical dashed line.



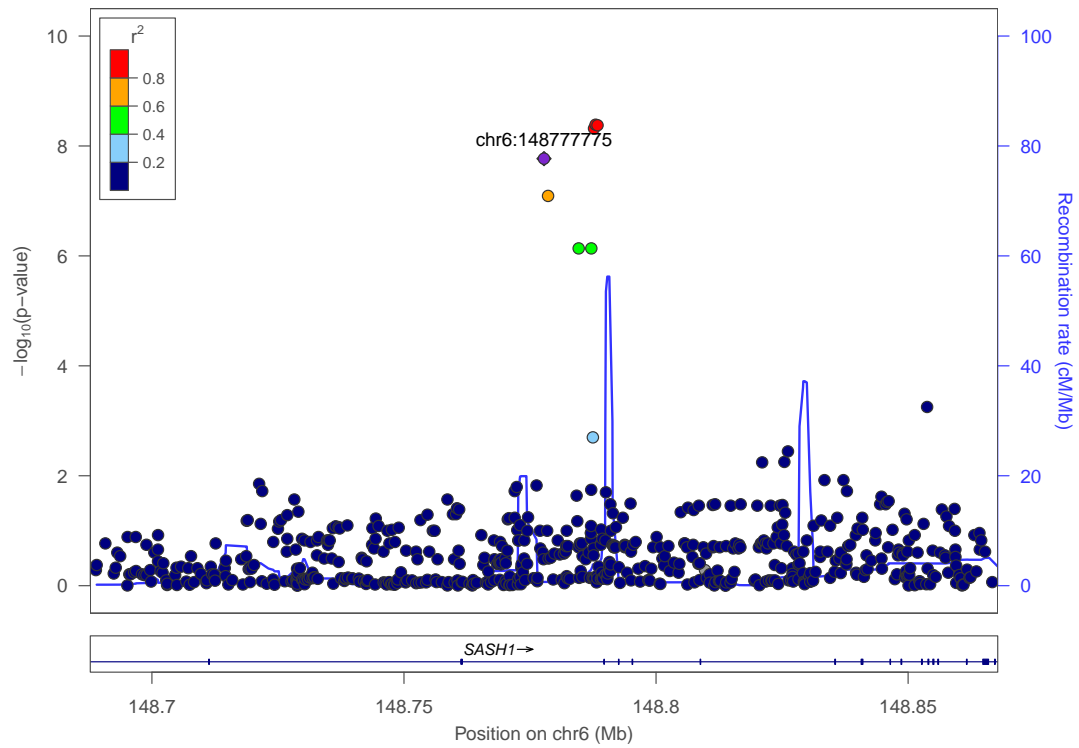

(a) *pspC* allele 8, and chromosome 6 (*SASH1*)

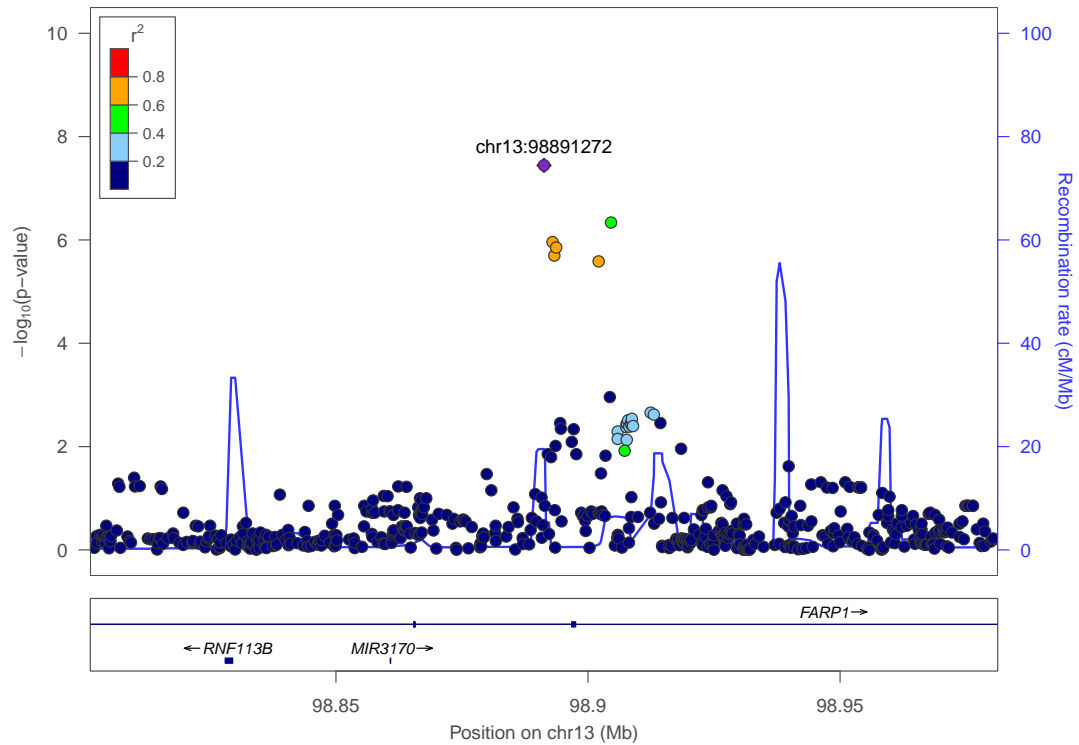

(b) *pspC* allele 9, and chromosome 13 (*FARP1*)

**Supplementary figure 14:** Locuszoom plot of association between *pspC* allele and imputed human SNPs.

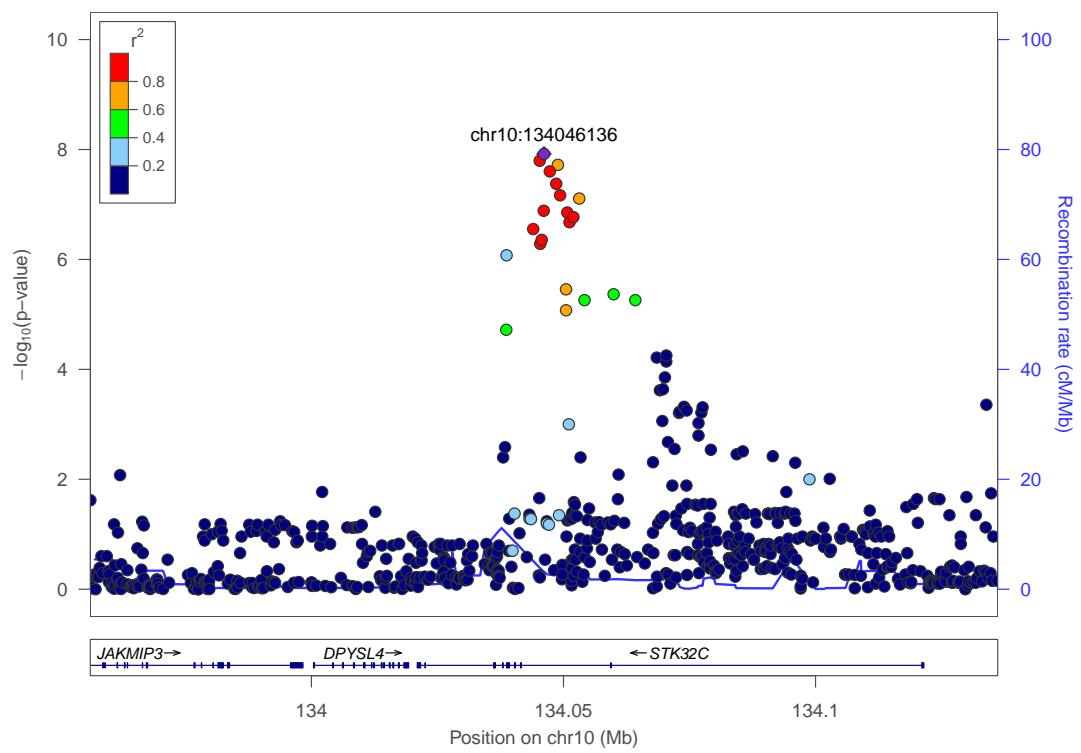

**Supplementary figure 15:** LocusZoom plot of association on chromosome 10 with sequence cluster 8.

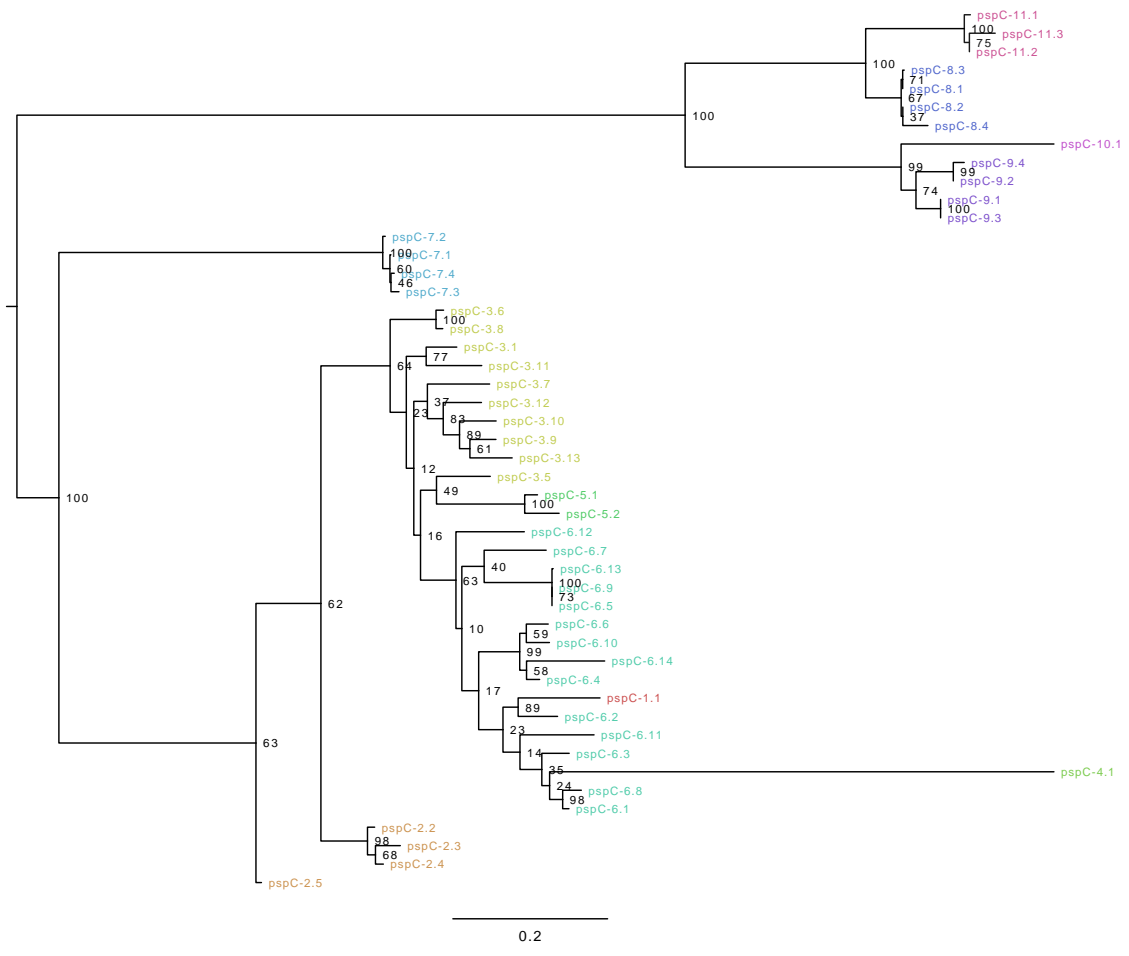

**Supplementary figure 16:** Maximum likelihood tree of *pspC* protein alignment, with 100 bootstrap replicates (nodes are labelled with bootstrap supports). Tips are coloured by allele group.

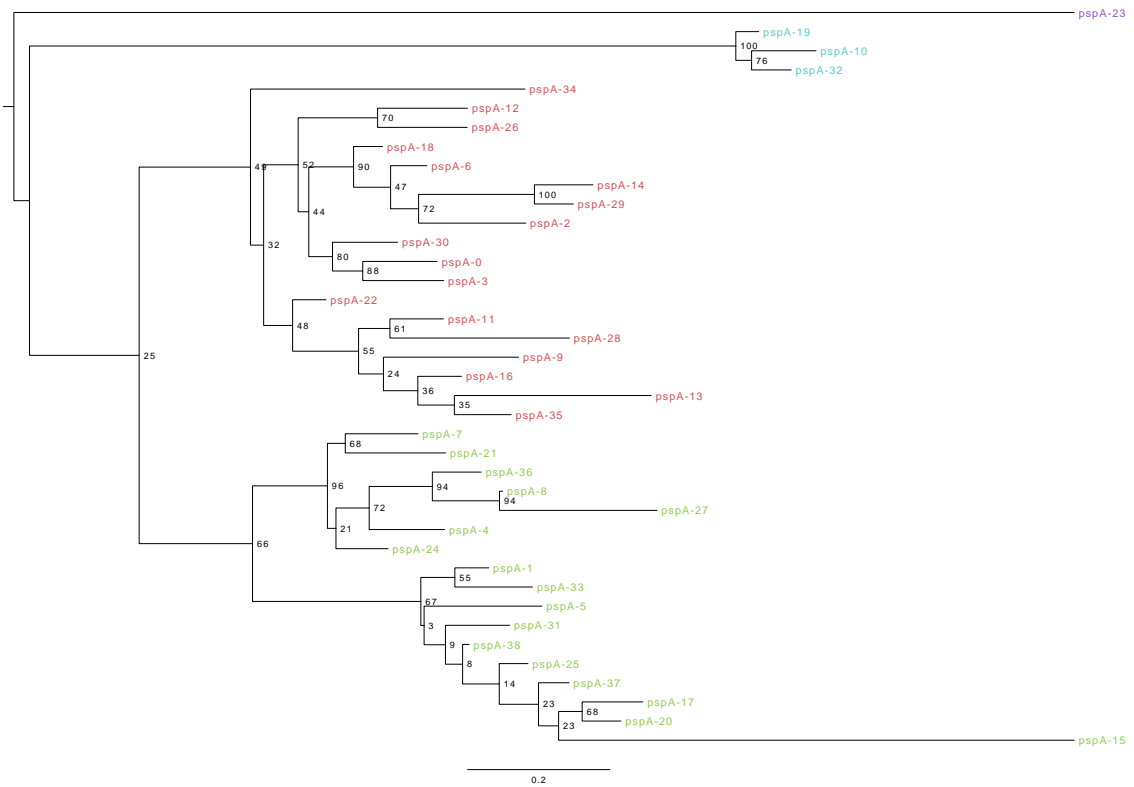

**Supplementary figure 17:** Maximum likelihood tree of *pspA* protein alignment, with 100 bootstrap replicates (nodes are labelled with bootstrap supports). Tips are coloured by allele group.

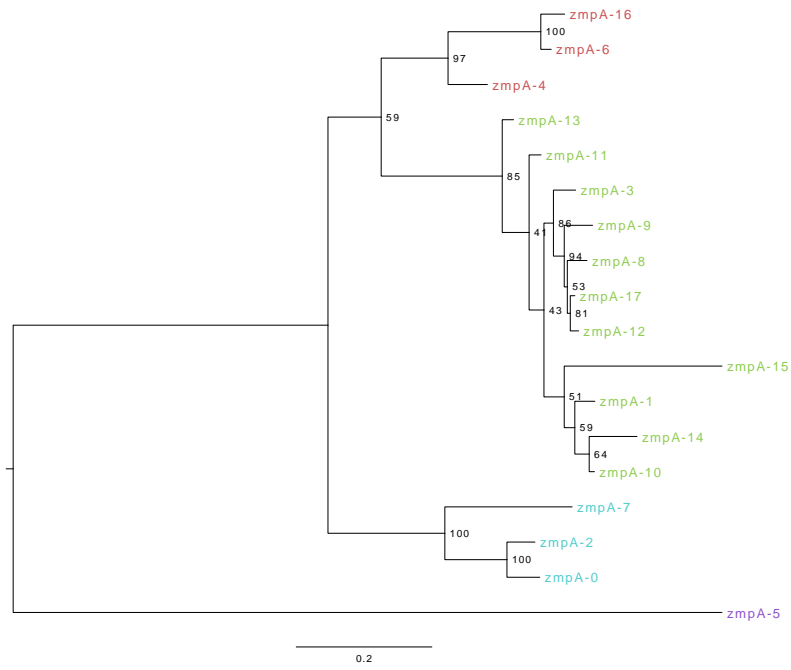

**Supplementary figure 18:** Maximum likelihood tree of *zmpA* protein alignment, with 100 bootstrap replicates (nodes are labelled with bootstrap supports). Tips are coloured by allele group.

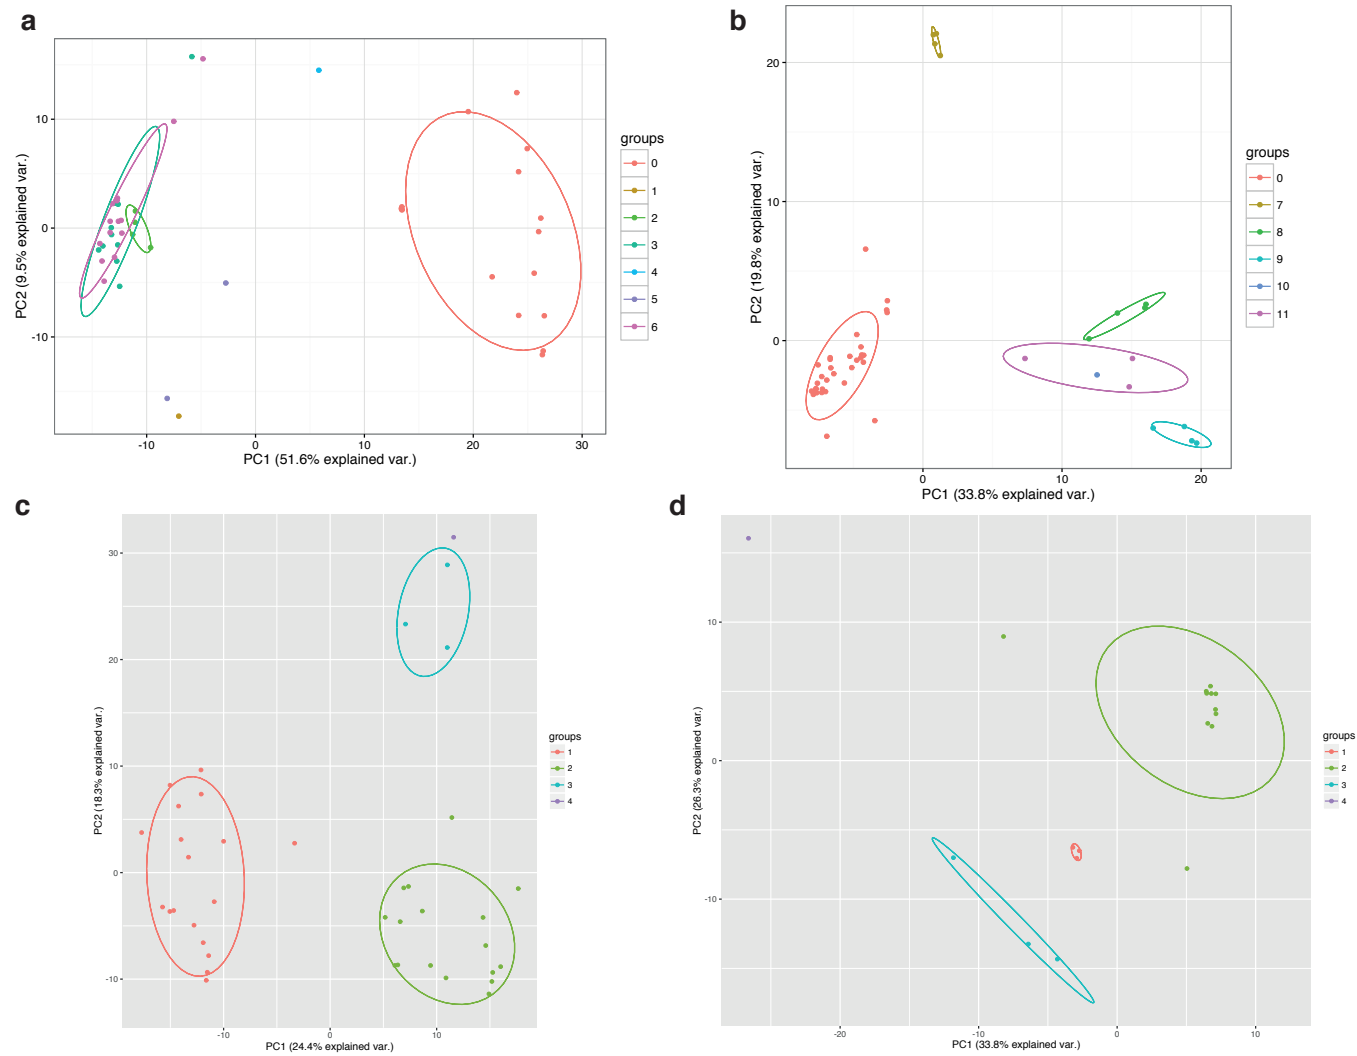

**Supplementary figure 19:** PCA plots of classifiers used on antigen training data, first two principal components shown in each case. Points are coloured by the allele number, where 0 is a genome without the antigen. Where more than one point is available for a class, an ellipse has been drawn around its centroid. **a)** PspC, alleles 0–6; **b)** PspC, alleles 0,7–11; **c)** PspA, alleles 1–4; **d)** ZmpA, alleles 1–4

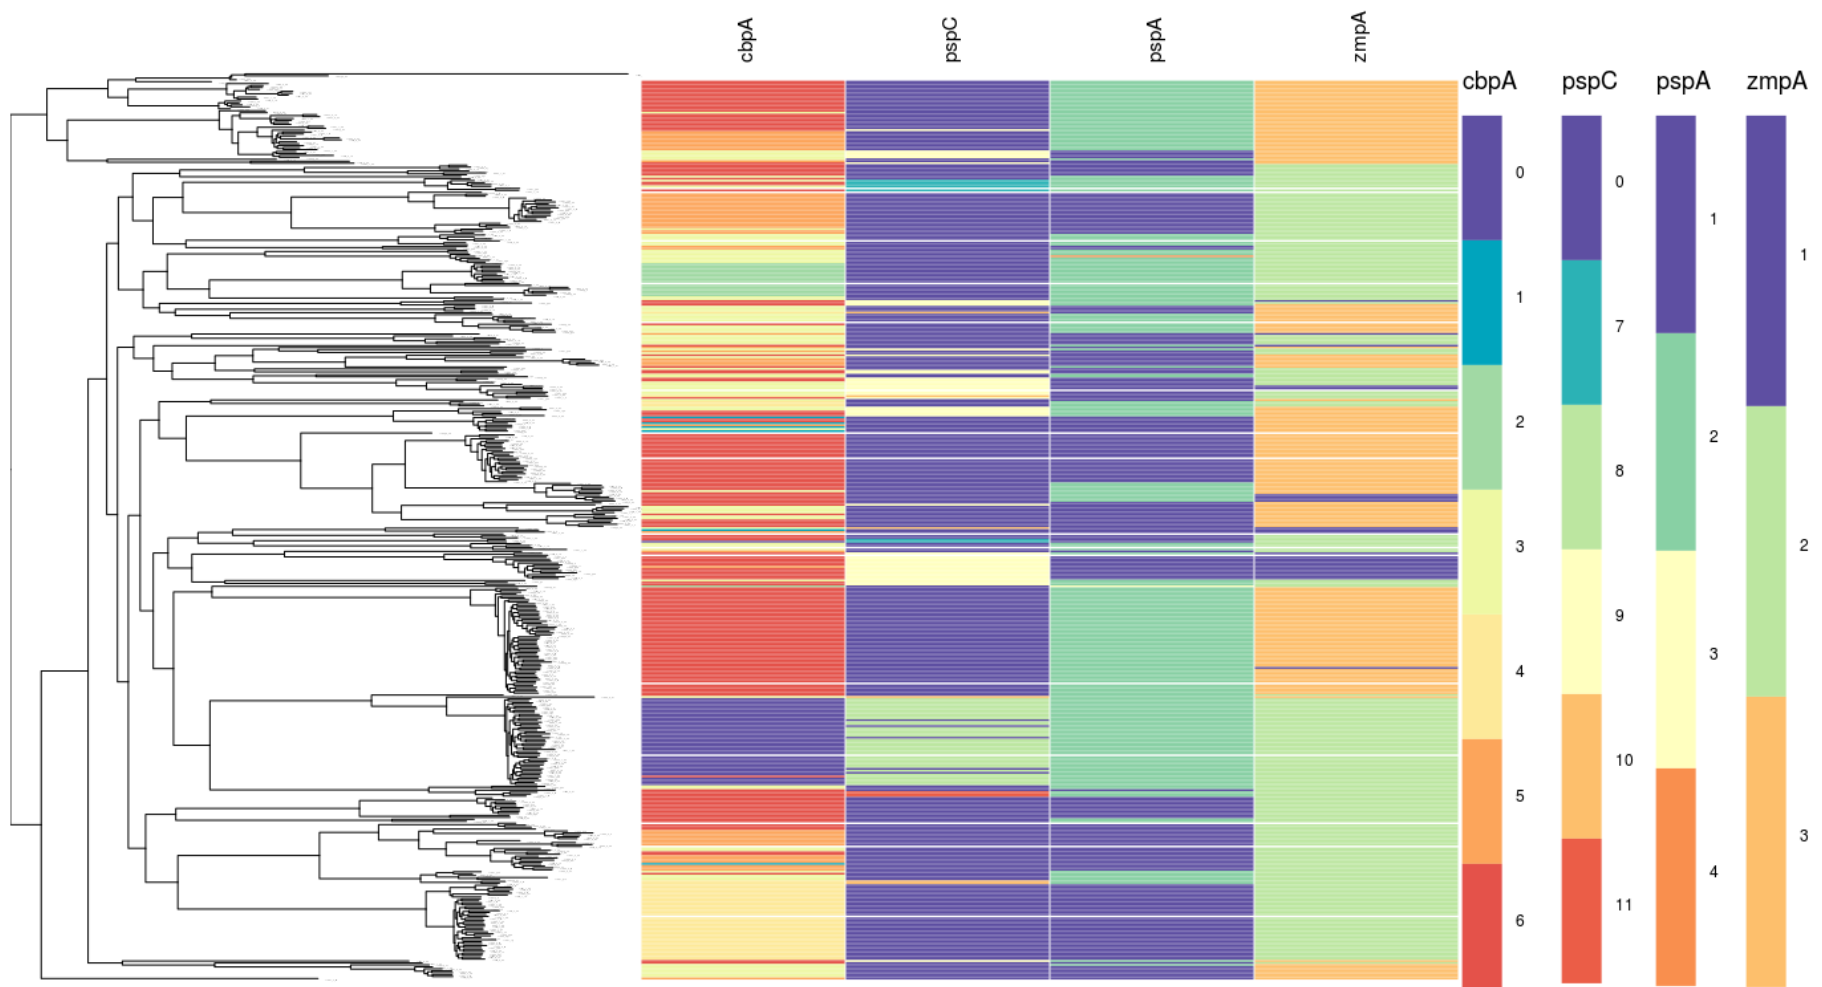

**Supplementary figure 20:** The inferred allele of pneumococcal antigens *zmpA*, *pspA* and *pspC*. Left: phylogenetic tree of CSF isolates. Right: tips coloured by the inferred allele for three antigens, and key. The first two columns are alleles 1–6 and 7–11 of *pspC*, which may have two copies present.

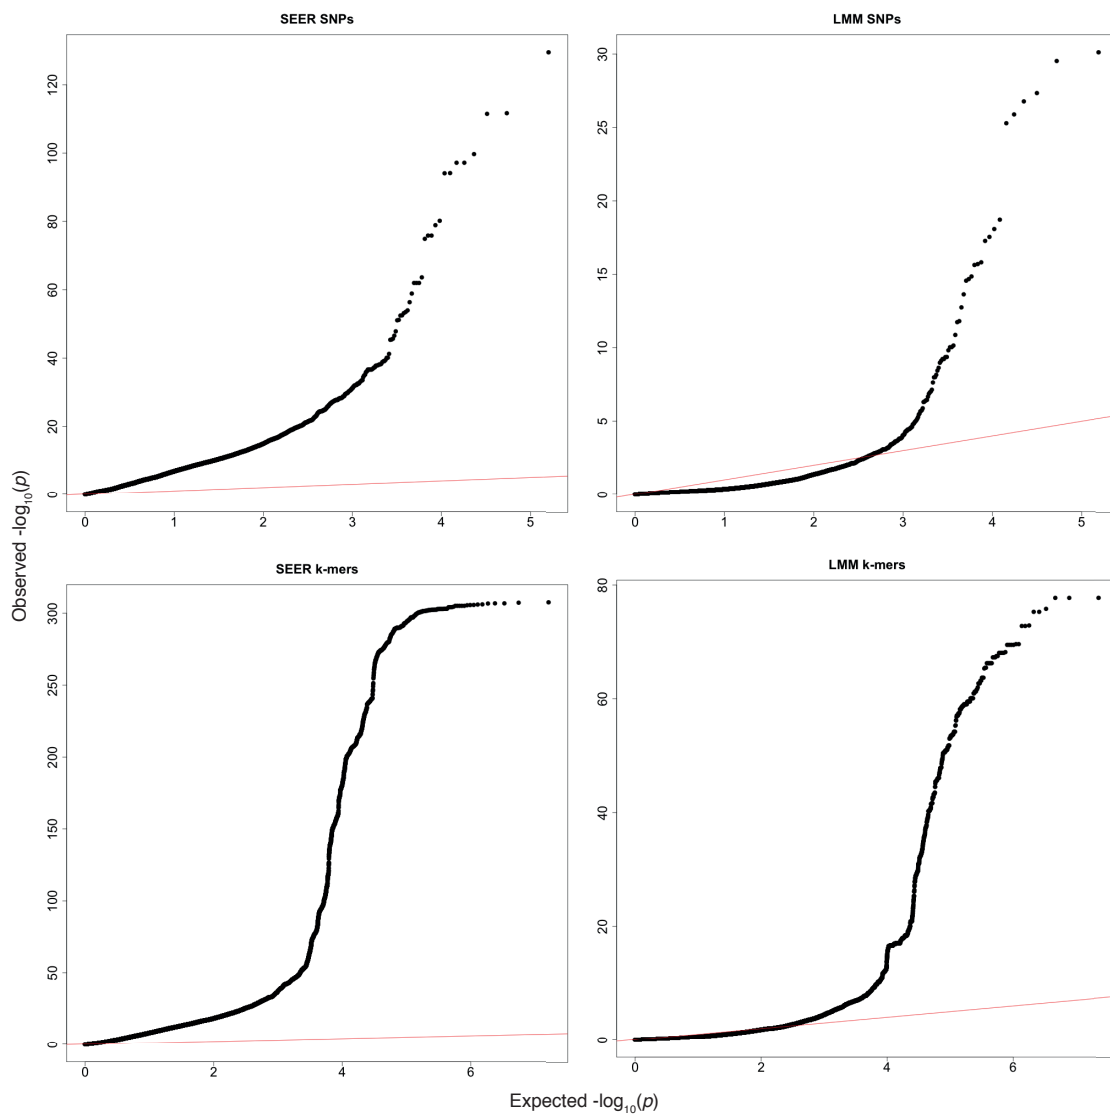

**Supplementary figure 21:** Quantile-Quantile plots for association of common variation in the pathogen genomes. Red line is for observations following the null-hypothesis of no association, plotted points are observed p-values from each method. Top row: p-values from SNPs and INDELs from mapping; bottom row: p-values from k-mers. Left column: SEER run with the first ten population structure components. Right column: FaST-LMM run on the same input.



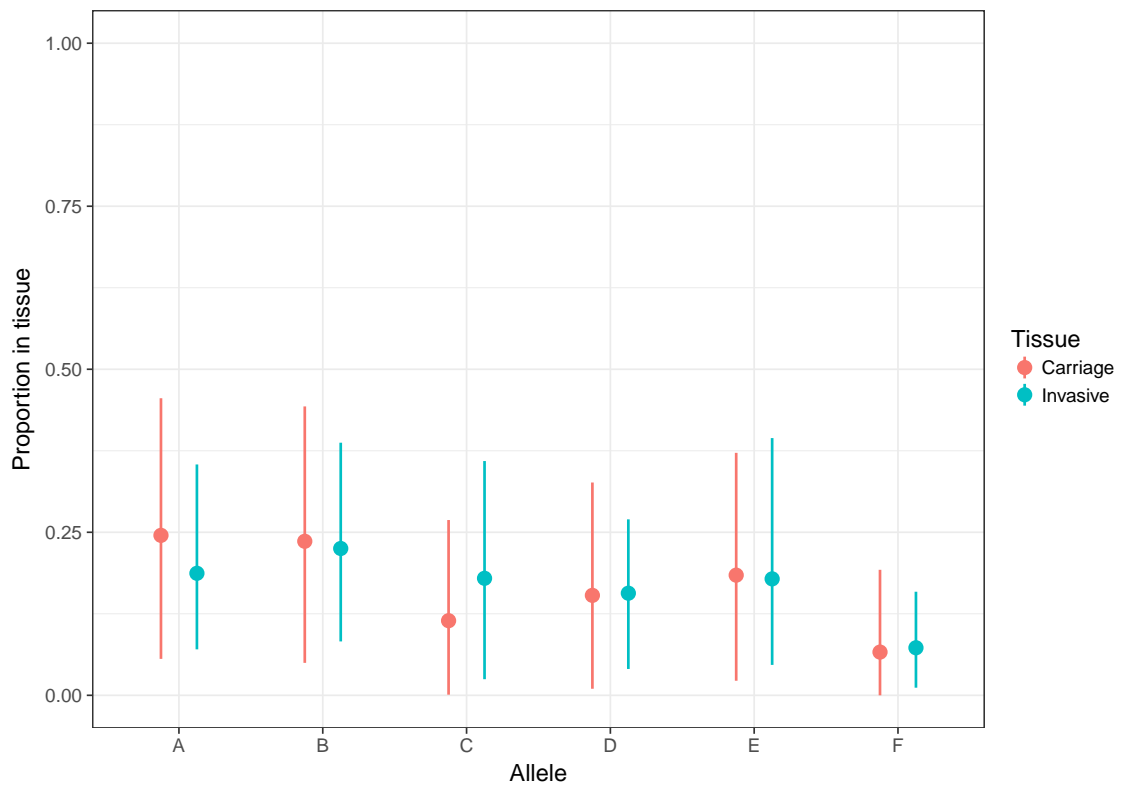

**Supplementary figure 22:** Mean (points) and 95% highest posterior density (lines) for  $\mu_c$  in the *ivr* allele model. This shows the proportion of each allele present in each of carriage (red) and meningitis (turquoise) isolates, effectively pooling across all samples.

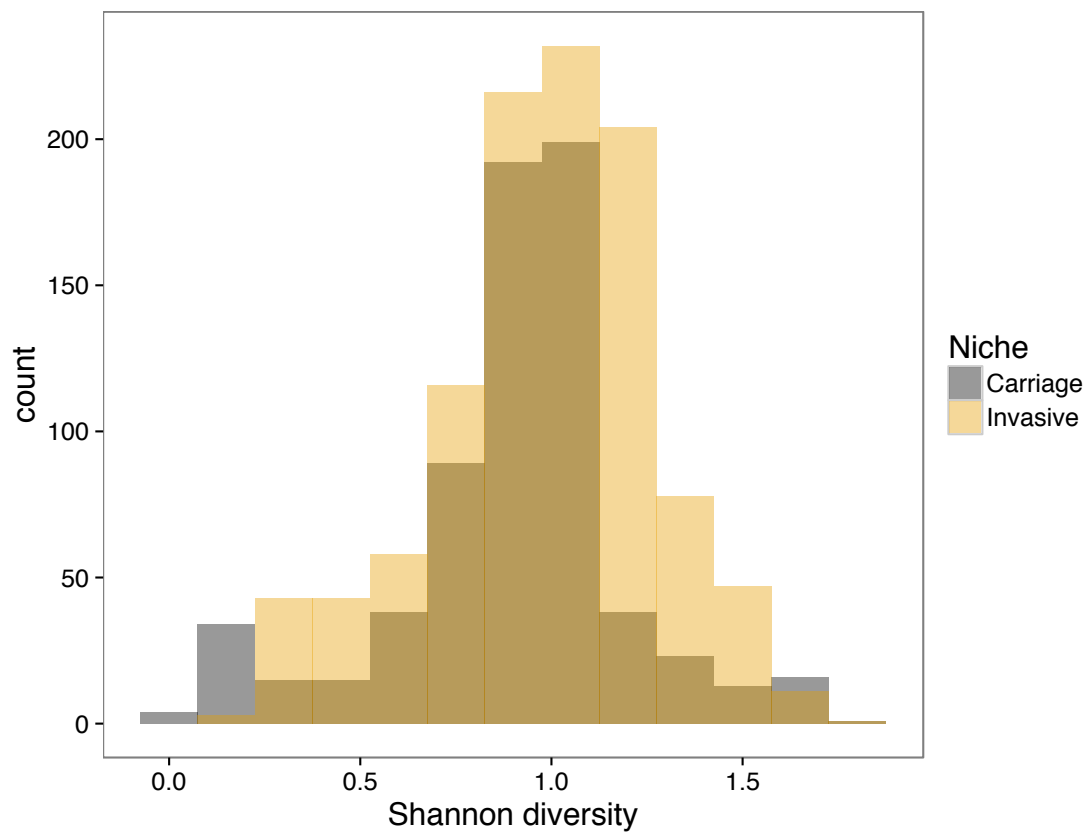

**Supplementary figure 23:** Histogram of the Shannon diversity of the *ivr* allele makeup in carriage and invasive samples, using the mean frequency of each allele from the highest posterior density.

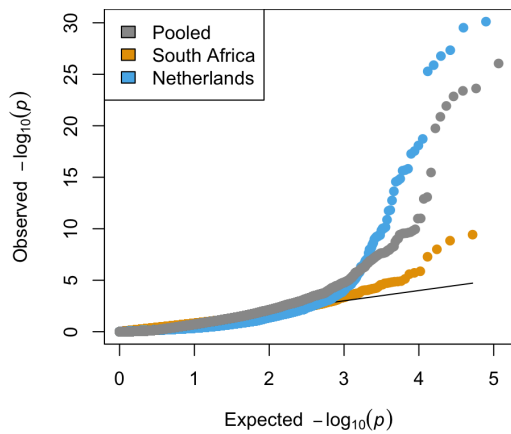

(a) Common SNP and INDEL variants.

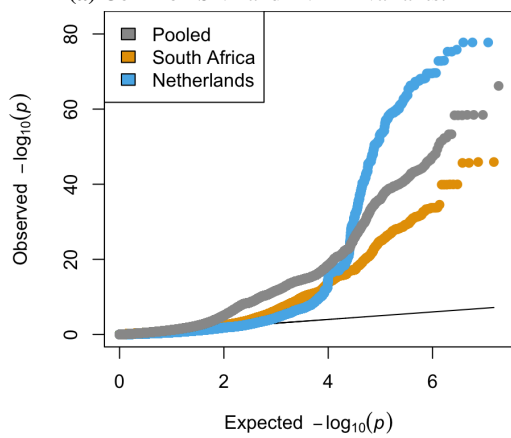

(c) Variable length k-mers.

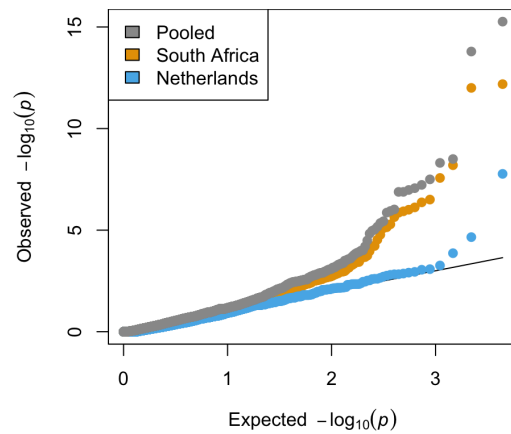

(b) Accessory COG presence/absence.

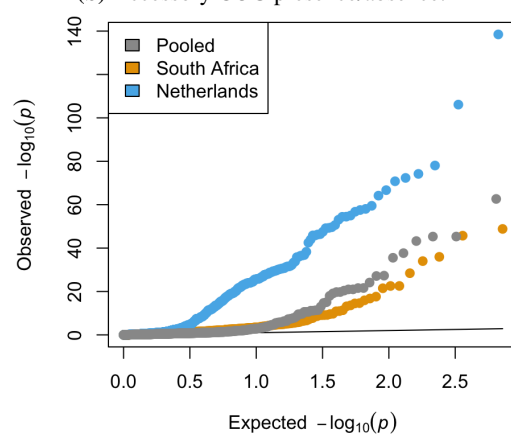

(d) Burden test of rare LoF variants.

**Supplementary figure 24:** QQ-plots of association of pneumococcal variants. Shown are p-values from both bacterial cohorts individually, and when all the data was pooled. Each panel is for a different category of variant.

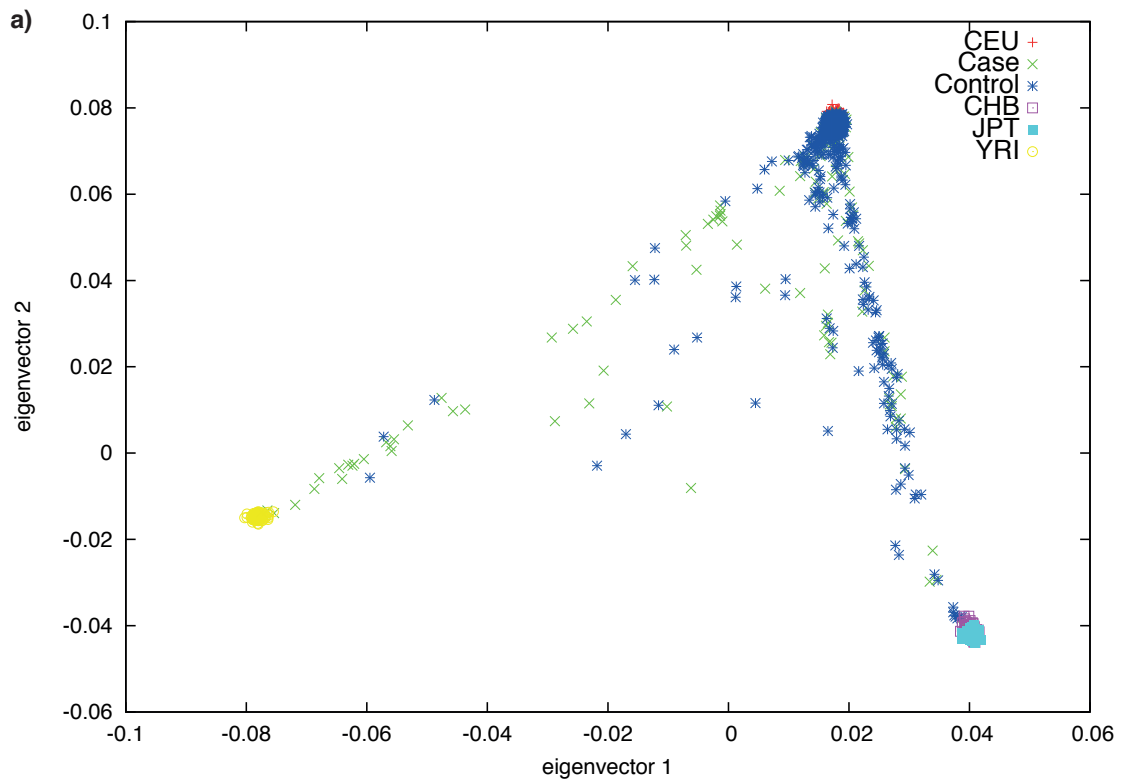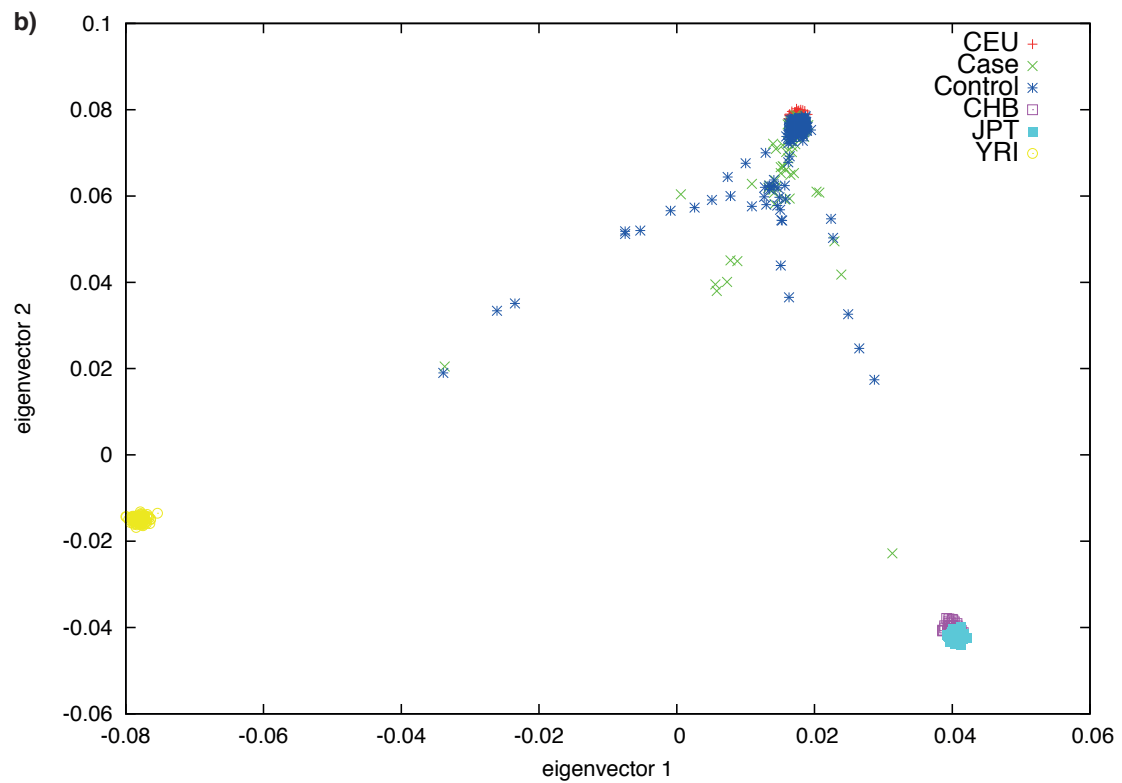

**Supplementary figure 25:** Projection of samples onto first two principal components of case (green crosses) and control (blue stars) samples from **a)** the Netherlands and **b)** Denmark with HapMap phase I populations. HapMap populations are 3 (red crosses) – CEU, European; 4 (pink squares) – CHB, Han Chinese; 5 (turquoise squares) – JPT, Japanese; 6 (yellow squares) – YRI, Yoruba Nigerians.
